# Supplementary material for: Feasibility of Video Consultation for Preterm Neurodevelopmental Follow-up Care During the COVID-19 Pandemic: Cohort Study
Source: PubMed Central journal article supplement (PMC9879316; doi:10.2196/40940), 2023-01-25
Supplement: pediatrics_v6i1e40940_app2.pdf [file pediatrics_v6i1e40940_app2.pdf]

Multimedia Appendix - Video consultation in preterm follow-up care during the COVID-19 pandemic - opportunities and challenges; this is a Multimedia Appendix to a full manuscript published in the J Med Internet Res. For full copyright and citation information see <http://dx.doi.org/10.2196/jmir.xxxx> (<http://dx.doi.org/10.2196/jmir.xxxx>)

L. Cordier

July 2022

- 1 DESCRIPTIVE STATISTIC
- 2 normal distribution
  - 2.1 video consulting
  - 2.2 in person appointment
- 3 GROUP DIFFERENCES: Calculated group differences between a video consultation and an outpatient appointment.
  - 3.1 Mann-Whitney U test
  - 3.2 First significant difference
  - 3.3 Second significant difference
  - 3.4 Third significant difference
  - 3.5 Fourth significant difference
- 4 LOCKDOWN
  - 4.1 Distribution over time of interviews conducted.
  - 4.2 Calculation of the differences between the lockdowns
- 5 EXPLORATORY DATA ANALYSIS
  - 5.1 Spearman rank correlations
- 6 Figure

## 1 DESCRIPTIVE STATISTIC

summary (ENN)

```

##          ID          Gruppe      ENN_00_Datum_RAW  ENN_00_Datum
## ENNT001: 1   Min.      :0.0000          :11      Min.      :200107
## ENNT002: 1   1st Qu.:0.0000    30.04.20: 5      1st Qu.:200509
## ENNT003: 1   Median :0.0000    25.05.20: 4      Median :200719
## ENNT004: 1   Mean   :0.3763    08.05.20: 3      Mean   :200846
## ENNT005: 1   3rd Qu.:1.0000    05.04.20: 2      3rd Qu.:201014
## ENNT006: 1   Max.    :1.0000    06.10.20: 2      Max.    :210125
## (Other):87          (Other) :66      NA's     :11
## ENN_1a_Gesprächsteilnehmer ENN_1b_Geschlecht ENN_1c_Alter
## Min.      :1.000          Min.      :1.000      Min.      :19.00
## 1st Qu.:1.000          1st Qu.:1.000      1st Qu.:30.00
## Median :1.000          Median :1.000      Median :34.00
## Mean   :1.033          Mean   :1.033      Mean   :32.73
## 3rd Qu.:1.000          3rd Qu.:1.000      3rd Qu.:36.00
## Max.    :2.000          Max.    :2.000      Max.    :47.00
## NA's     :1            NA's     :1          NA's     :8
## ENN_1d_Schulbildung_Mutter_in_Jahre ENN_1e_beide_Eltern ENN_2_Endgerät
## Min.      : 4.00          Min.      :0.0000      Min.      :1.000
## 1st Qu.:10.00          1st Qu.:0.0000      1st Qu.:1.000
## Median :13.00          Median :1.0000      Median :1.000
## Mean   :12.68          Mean   :0.5054      Mean   :1.618
## 3rd Qu.:14.00          3rd Qu.:1.0000      3rd Qu.:3.000
## Max.    :19.00          Max.    :1.0000      Max.    :3.000
## NA's     :6            NA's     :1          NA's     :38
## ENN_3_Bisheriger_persönlicher_Besuch_im_SPZ ENN_4_Zeit_für_Anfahrt
## Min.      : 0.0000          Min.      : 4.00
## 1st Qu.: 0.0000          1st Qu.:20.00
## Median : 1.0000          Median :30.00
## Mean   : 0.7742          Mean   :28.79
## 3rd Qu.: 1.0000          3rd Qu.:37.50
## Max.    :10.0000          Max.    :90.00
## NA's     :1            NA's     :2
## ENN_5_Entfernung_km ENN_6_Urlaub_nehmen_für_Termin ENN_7_Potentielle_Wartezeit
## Min.      : 1.00          Min.      : 0.000      Min.      : 0.00
## 1st Qu.: 5.00          1st Qu.: 0.000      1st Qu.: 5.00
## Median :10.00          Median : 0.000      Median : 10.00
## Mean   :15.86          Mean   : 1.283      Mean   : 19.11
## 3rd Qu.:21.25          3rd Qu.: 1.000      3rd Qu.: 30.00
## Max.    :75.00          Max.    :60.000      Max.    :180.00
## NA's     :5            NA's     :1          NA's     :3
## ENN_8_Aktive_Rolle_Gesundheit_Kind ENN_9_Qualität_ENN
## Min.      : 1.000          Min.      :5.000
## 1st Qu.: 7.000          1st Qu.:7.000
## Median : 7.000          Median :7.000
## Mean   : 7.226          Mean   :6.882
## 3rd Qu.: 7.000          3rd Qu.:7.000
## Max.    :20.000          Max.    :7.000
## ENN_10_Zufriedenheit_Video_Audio ENN_11_Pünktlichkeit ENN_12_Effizienz
## Min.      :2.000          Min.      :1.000      Min.      :5.000
## 1st Qu.:6.000          1st Qu.:6.000      1st Qu.:7.000
## Median :7.000          Median :7.000      Median :7.000
## Mean   :6.359          Mean   :6.506      Mean   :6.882
## 3rd Qu.:7.000          3rd Qu.:7.000      3rd Qu.:7.000
## Max.    :7.000          Max.    :7.000      Max.    :7.000

```

```

## NA's :29 NA's :4
## ENN_13_Vertrauliche_Weise ENN_14__Sensible_Info ENN_15_Kind_beurteilbar
## Min. :6.000 Min. :6.000 Min. :4.000
## 1st Qu.:7.000 1st Qu.:7.000 1st Qu.:7.000
## Median :7.000 Median :7.000 Median :7.000
## Mean :6.946 Mean :6.946 Mean :6.828
## 3rd Qu.:7.000 3rd Qu.:7.000 3rd Qu.:7.000
## Max. :7.000 Max. :7.000 Max. :7.000
##
## ENN_16_Entspannung_und_Kooperation ENN_17_selber_untersuchen
## Min. :0.000 Min. :0.000
## 1st Qu.:6.000 1st Qu.:7.000
## Median :7.000 Median :7.000
## Mean :6.409 Mean :6.492
## 3rd Qu.:7.000 3rd Qu.:7.000
## Max. :7.000 Max. :7.000
## NA's :32
## ENN_18_Positionswechsel_Erklärungen ENN_19_Zeitlicher_Umfang ENN_20_Atmosphäre
## Min. :0.000 Min. :3.000 Min. :1.000
## 1st Qu.:7.000 1st Qu.:7.000 1st Qu.:7.000
## Median :7.000 Median :7.000 Median :7.000
## Mean :6.571 Mean :6.807 Mean :6.828
## 3rd Qu.:7.000 3rd Qu.:7.000 3rd Qu.:7.000
## Max. :7.000 Max. :7.000 Max. :7.000
## NA's :37 NA's :5
## ENN_21_gute_Betreuung ENN_27_Zufriedenheit_Insgesamt
## Min. :6.000 Min. :5.000
## 1st Qu.:7.000 1st Qu.:7.000
## Median :7.000 Median :7.000
## Mean :6.946 Mean :6.924
## 3rd Qu.:7.000 3rd Qu.:7.000
## Max. :7.000 Max. :7.000
## NA's :1
## ENN_22_Häusliche_Umgebung_Sicherer_vor_Erregern
## Min. :3.000
## 1st Qu.:7.000
## Median :7.000
## Mean :6.612
## 3rd Qu.:7.000
## Max. :7.000
## NA's :8
## ENN_23_Kontaktvermeidung_andere_Menschen
## Min. :1.000
## 1st Qu.:5.000
## Median :6.000
## Mean :5.643
## 3rd Qu.:7.000
## Max. :7.000
## NA's :9
## ENN_24_Kontaktvermeidung_medizinisches_Personal ENN_25_Sorge_vor_Corona
## Min. :1.000 Min. :1.000
## 1st Qu.:3.000 1st Qu.:5.000
## Median :5.000 Median :7.000
## Mean :4.435 Mean :5.635
## 3rd Qu.:7.000 3rd Qu.:7.000
## Max. :7.000 Max. :7.000

```

```
## NA's :8 NA's :8
## ENN_26_Videosprechstunde_ähnlich_Termin_vor_Ort ENN_28_Zukünftiger_Anspruch
## Min. :1.000 Min. :2.000
## 1st Qu.:5.000 1st Qu.:7.000
## Median :7.000 Median :7.000
## Mean :5.672 Mean :6.491
## 3rd Qu.:7.000 3rd Qu.:7.000
## Max. :7.000 Max. :7.000
## NA's :32 NA's :36
## X
## Min. :7
## 1st Qu.:7
## Median :7
## Mean :7
## 3rd Qu.:7
## Max. :7
## NA's :91
```

```
describe(ENN)
```

```

## ENN
##
## 37 Variables          93 Observations
## -----
## ID
##      n missing distinct
##      93      0      93
##
## lowest : ENNT001 ENNT002 ENNT003 ENNT004 ENNT005
## highest: ENNV054 ENNV055 ENNV056 ENNV057 ENNV058
## -----
## Gruppe
##      n missing distinct      Info      Sum      Mean      Gmd
##      93      0      2      0.704      35      0.3763      0.4745
##
## -----
## ENN_00_Datum_RAW
##      n missing distinct
##      93      0      57
##
## lowest :          05.04.20 05.05.20 05.11.20 06.10.20
## highest: 29.06.20 30.04.20 30.07.20 30.10.20 30.11.20
## -----
## ENN_00_Datum
##      n missing distinct      Info      Mean      Gmd      .05      .10
##      82      11      56      0.999      200846      556.2      200307      200408
##      .25      .50      .75      .90      .95
##      200509      200719      201014      201120      201126
##
## lowest : 200107 200207 200307 200405 200408, highest: 201126 201130 201214 201216
210125
## -----
## ENN_1a_Gesprächsteilnehmer
##      n missing distinct      Info      Mean      Gmd
##      92      1      2      0.095      1.033      0.06378
##
## Value          1      2
## Frequency      89      3
## Proportion 0.967 0.033
## -----
## ENN_1b_Geschlecht
##      n missing distinct      Info      Mean      Gmd
##      92      1      2      0.095      1.033      0.06378
##
## Value          1      2
## Frequency      89      3
## Proportion 0.967 0.033
## -----
## ENN_1c_Alter
##      n missing distinct      Info      Mean      Gmd      .05      .10
##      85      8      24      0.992      32.73      6.08      22.0      25.4
##      .25      .50      .75      .90      .95
##      30.0      34.0      36.0      39.0      40.0
##
## lowest : 19 20 21 22 23, highest: 39 40 41 42 47

```

```

## -----
## ENN_1d_Schulbildung_Mutter_in_Jahre
##      n missing distinct      Info      Mean      Gmd      .05      .10
##      87      6      13      0.954      12.68      3.107      9.3      10.0
##      .25      .50      .75      .90      .95
##      10.0      13.0      14.0      16.4      18.0
##
## lowest : 4 8 9 10 11, highest: 15 16 17 18 19
##
## Value      4      8      9      10      11      12      13      14      15      16      17
## Frequency  2      2      1      19      2      10      28      3      6      5      2
## Proportion 0.023 0.023 0.011 0.218 0.023 0.115 0.322 0.034 0.069 0.057 0.023
##
## Value      18      19
## Frequency  5      2
## Proportion 0.057 0.023
## -----
## ENN_1e_beide_Eltern
##      n missing distinct      Info      Sum      Mean      Gmd
##      93      0      2      0.75      47      0.5054      0.5054
## -----
## ENN_2_Endgerät
##      n missing distinct      Info      Mean      Gmd
##      55      38      3      0.699      1.618      0.8646
##
## Value      1      2      3
## Frequency  36      4      15
## Proportion 0.655 0.073 0.273
## -----
## ENN_3_Bisheriger_persönlicher_Besuch_im_SPZ
##      n missing distinct      Info      Mean      Gmd
##      93      0      3      0.67      0.7742      0.6353
##
## Value      0      1      10
## Frequency  30      62      1
## Proportion 0.323 0.667 0.011
## -----
## ENN_4_Zeit_für_Anfahrt
##      n missing distinct      Info      Mean      Gmd      .05      .10
##      91      2      16      0.971      28.79      17.07      10.0      10.0
##      .25      .50      .75      .90      .95
##      20.0      30.0      37.5      45.0      60.0
##
## lowest : 4 5 10 12 14, highest: 45 50 60 75 90
##
## Value      4      5      10      12      14      15      20      25      30      35      40
## Frequency  1      3      9      1      1      4      18      6      24      1      9
## Proportion 0.011 0.033 0.099 0.011 0.011 0.044 0.198 0.066 0.264 0.011 0.099
##
## Value      45      50      60      75      90
## Frequency  5      1      6      1      1
## Proportion 0.055 0.011 0.066 0.011 0.011
## -----
## ENN_5_Entfernung_km
##      n missing distinct      Info      Mean      Gmd      .05      .10

```

```

##      88      5      31      0.995      15.86      15.42      2.00      2.00
##      .25      .50      .75      .90      .95
##      5.00      10.00      21.25      35.90      40.00
##
## lowest : 1 2 3 4 5, highest: 40 45 60 70 75
## -----
## ENN_6_Urlaub_nehmen_für_Termin
##      n missing distinct      Info      Mean      Gmd
##      92      1      6      0.749      1.283      2.224
##
## lowest : 0 1 2 4 5, highest: 1 2 4 5 60
##
## Value      0      1      2      4      5      60
## Frequency   56      27      2      3      3      1
## Proportion 0.609 0.293 0.022 0.033 0.033 0.011
## -----
## ENN_7_Potentielle_Wartezeit
##      n missing distinct      Info      Mean      Gmd      .05      .10
##      90      3      14      0.978      19.11      21.88      0      0
##      .25      .50      .75      .90      .95
##      5      10      30      45      60
##
## lowest : 0 1 5 7 10, highest: 45 60 70 90 180
##
## Value      0      1      5      7      10      15      20      30      40      45      60
## Frequency   12      4      14      3      19      7      4      16      1      2      5
## Proportion 0.133 0.044 0.156 0.033 0.211 0.078 0.044 0.178 0.011 0.022 0.056
##
## Value      70      90      180
## Frequency   1      1      1
## Proportion 0.011 0.011 0.011
## -----
## ENN_8_Aktive_Rolle_Gesundheit_Kind
##      n missing distinct      Info      Mean      Gmd
##      93      0      6      0.263      7.226      0.9065
##
## lowest : 1 5 6 7 10, highest: 5 6 7 10 20
##
## Value      1      5      6      7      10      20
## Frequency   1      1      3      84      2      2
## Proportion 0.011 0.011 0.032 0.903 0.022 0.022
## -----
## ENN_9_Qualität_ENN
##      n missing distinct      Info      Mean      Gmd
##      93      0      3      0.236      6.882      0.2221
##
## Value      5      6      7
## Frequency   3      5      85
## Proportion 0.032 0.054 0.914
## -----
## ENN_10_Zufriedenheit_Video_Audio
##      n missing distinct      Info      Mean      Gmd
##      64      29      6      0.602      6.359      1.038
##
## lowest : 2 3 4 5 6, highest: 3 4 5 6 7
##

```

```

## Value          2      3      4      5      6      7
## Frequency      1      2      3      8      3     47
## Proportion 0.016 0.031 0.047 0.125 0.047 0.734
## -----
## ENN_11_Punktlichkeit
##          n missing distinct      Info      Mean      Gmd
##          89      4          6     0.623     6.506     0.8069
##
## lowest : 1 3 4 5 6, highest: 3 4 5 6 7
##
## Value          1      3      4      5      6      7
## Frequency      1      1      3      5     15     64
## Proportion 0.011 0.011 0.034 0.056 0.169 0.719
## -----
## ENN_12_Effizienz
##          n missing distinct      Info      Mean      Gmd
##          93      0          3     0.288     6.882     0.2155
##
## Value          5      6      7
## Frequency      1      9     83
## Proportion 0.011 0.097 0.892
## -----
## ENN_13_Vertrauliche_Weise
##          n missing distinct      Info      Mean      Gmd
##          93      0          2     0.153     6.946     0.1029
##
## Value          6      7
## Frequency      5     88
## Proportion 0.054 0.946
## -----
## ENN_14_Sensible_Info
##          n missing distinct      Info      Mean      Gmd
##          93      0          2     0.153     6.946     0.1029
##
## Value          6      7
## Frequency      5     88
## Proportion 0.054 0.946
## -----
## ENN_15_Kind_beurteilbar
##          n missing distinct      Info      Mean      Gmd
##          93      0          4     0.263     6.828     0.3221
##
## Value          4      5      6      7
## Frequency      2      3      4     84
## Proportion 0.022 0.032 0.043 0.903
## -----
## ENN_16_Entspannung_und_Kooperation
##          n missing distinct      Info      Mean      Gmd
##          93      0          6     0.683     6.409     0.9327
##
## lowest : 0 3 4 5 6, highest: 3 4 5 6 7
##
## Value          0      3      4      5      6      7
## Frequency      1      1      5      6     17     63
## Proportion 0.011 0.011 0.054 0.065 0.183 0.677
## -----

```



```

## ENN_17_selber_untersuchen
##      n missing distinct      Info      Mean      Gmd
##      61      32      5      0.54      6.492      0.8929
##
## lowest : 0 4 5 6 7, highest: 0 4 5 6 7
##
## Value      0      4      5      6      7
## Frequency  2      1      3      8     47
## Proportion 0.033 0.016 0.049 0.131 0.770
## -----
## ENN_18_Positionswechsel_Erklärungen
##      n missing distinct      Info      Mean      Gmd
##      56      37      4      0.445      6.571      0.7844
##
## Value      0      5      6      7
## Frequency  2      2      6     46
## Proportion 0.036 0.036 0.107 0.821
## -----
## ENN_19_Zeitlicher_Umfang
##      n missing distinct      Info      Mean      Gmd
##      88      5      4      0.355      6.807      0.3503
##
## Value      3      5      6      7
## Frequency  1      2      9     76
## Proportion 0.011 0.023 0.102 0.864
## -----
## ENN_20_Atmosphäre
##      n missing distinct      Info      Mean      Gmd
##      93      0      4      0.236      6.828      0.3282
##
## Value      1      5      6      7
## Frequency  1      3      4     85
## Proportion 0.011 0.032 0.043 0.914
## -----
## ENN_21_gute_Betreuung
##      n missing distinct      Info      Mean      Gmd
##      93      0      2      0.153      6.946      0.1029
##
## Value      6      7
## Frequency  5     88
## Proportion 0.054 0.946
## -----
## ENN_27_Zufriedenheit_Insgesamt
##      n missing distinct      Info      Mean      Gmd
##      92      1      3      0.183      6.924      0.145
##
## Value      5      6      7
## Frequency  1      5     86
## Proportion 0.011 0.054 0.935
## -----
## ENN_22_Häusliche_Umgebung_Sicherer_vor_Erregern
##      n missing distinct      Info      Mean      Gmd
##      85      8      5      0.465      6.612      0.6779
##
## lowest : 3 4 5 6 7, highest: 3 4 5 6 7
##

```

```

## Value          3      4      5      6      7
## Frequency      2      3      5      6     69
## Proportion 0.024 0.035 0.059 0.071 0.812
## -----
## ENN_23_Kontaktvermeidung_andere_Menschen
##      n missing distinct      Info      Mean      Gmd
##      84      9      7      0.918      5.643      1.605
##
## lowest : 1 2 3 4 5, highest: 3 4 5 6 7
##
## Value          1      2      3      4      5      6      7
## Frequency      2      2      3     11     15     17     34
## Proportion 0.024 0.024 0.036 0.131 0.179 0.202 0.405
## -----
## ENN_24_Kontaktvermeidung_medizinisches_Personal
##      n missing distinct      Info      Mean      Gmd
##      85      8      7      0.954      4.435      2.559
##
## lowest : 1 2 3 4 5, highest: 3 4 5 6 7
##
## Value          1      2      3      4      5      6      7
## Frequency     20      1      6      9     17      8     24
## Proportion 0.235 0.012 0.071 0.106 0.200 0.094 0.282
## -----
## ENN_25_Sorge_vor_Corona
##      n missing distinct      Info      Mean      Gmd
##      85      8      7      0.846      5.635      1.862
##
## lowest : 1 2 3 4 5, highest: 3 4 5 6 7
##
## Value          1      2      3      4      5      6      7
## Frequency      6      1      5      7     13      8     45
## Proportion 0.071 0.012 0.059 0.082 0.153 0.094 0.529
## -----
## ENN_26_Videosprechstunde_ähnlich_Termin_vor_Ort
##      n missing distinct      Info      Mean      Gmd
##      61     32      7      0.85      5.672      1.82
##
## lowest : 1 2 3 4 5, highest: 3 4 5 6 7
##
## Value          1      2      3      4      5      6      7
## Frequency      4      1      2      7      8      7     32
## Proportion 0.066 0.016 0.033 0.115 0.131 0.115 0.525
## -----
## ENN_28_Zukünftiger_Anspruch
##      n missing distinct      Info      Mean      Gmd
##      57     36      6      0.538      6.491      0.8584
##
## lowest : 2 3 4 5 6, highest: 3 4 5 6 7
##
## Value          2      3      4      5      6      7
## Frequency      1      1      1      7      3     44
## Proportion 0.018 0.018 0.018 0.123 0.053 0.772
## -----
## X
##      n missing distinct      Info      Mean      Gmd

```

```
##          2          91          1          0          7          0
##
## Value          7
## Frequency      2
## Proportion     1
## -----
```

```
describeBy(ENN, group="Gruppe")
```

```
## Warning in FUN(newX[, i], ...): kein nicht-fehlendes Argument für min; gebe Inf
## zurück
```

```
## Warning in FUN(newX[, i], ...): kein nicht-fehlendes Argument für min; gebe Inf
## zurück
```

```
## Warning in FUN(newX[, i], ...): kein nicht-fehlendes Argument für min; gebe Inf
## zurück
```

```
## Warning in FUN(newX[, i], ...): kein nicht-fehlendes Argument für min; gebe Inf
## zurück
```

```
## Warning in FUN(newX[, i], ...): kein nicht-fehlendes Argument für max; gebe -Inf
## zurück
```

```
## Warning in FUN(newX[, i], ...): kein nicht-fehlendes Argument für max; gebe -Inf
## zurück
```

```
## Warning in FUN(newX[, i], ...): kein nicht-fehlendes Argument für max; gebe -Inf
## zurück
```

```
## Warning in FUN(newX[, i], ...): kein nicht-fehlendes Argument für max; gebe -Inf
## zurück
```

```

##
## Descriptive statistics by group
## Gruppe: 0
##
## vars  n      mean    sd
## ID*      1 58      64.50  16.89
## Gruppe   2 58       0.00   0.00
## ENN_00_Datum_RAW* 3 58      28.19  19.98
## ENN_00_Datum    4 50 200766.80 311.96
## ENN_1a_Gesprächsteilnehmer 5 58      1.03   0.18
## ENN_1b_Geschlecht 6 58      1.03   0.18
## ENN_1c_Alter    7 55      33.45   5.11
## ENN_1d_Schulbildung_Mutter_in_Jahre 8 57      12.40   2.82
## ENN_1e_beide_Eltern 9 58       0.60   0.49
## ENN_2_Endgerät 10 55      1.62   0.89
## ENN_3_Bisheriger_persönlicher_Besuch_im_SPZ 11 58      0.72   1.33
## ENN_4_Zeit_für_Anfahrt 12 57      28.58  16.22
## ENN_5_Entfernung_km 13 54      15.37  14.53
## ENN_6_Urlaub_nehmen_für_Termin 14 58      1.59   7.87
## ENN_7_Potentielle_Wartezeit 15 57      23.58  27.75
## ENN_8_Aktive_Rolle_Gesundheit_Kind 16 58      7.40   2.41
## ENN_9_Qualität_ENN 17 58      6.86   0.44
## ENN_10_Zufriedenheit_Video_Audio 18 58      6.29   1.26
## ENN_11_Pünktlichkeit 19 58      6.47   1.14
## ENN_12_Effizienz 20 58      6.86   0.40
## ENN_13_Vertrauliche>Weise 21 58      6.95   0.22
## ENN_14_Sensible_Info 22 58      6.93   0.26
## ENN_15_Kind_beurteilbar 23 58      6.76   0.71
## ENN_16_Entspannung_und_Kooperation 24 58      6.45   1.17
## ENN_17_selber_untersuchen 25 57      6.53   1.39
## ENN_18_Positionswechsel_Erklärungen 26 56      6.57   1.36
## ENN_19_Zeitlicher_Umfang 27 57      6.86   0.40
## ENN_20_Atmosphäre 28 58      6.90   0.41
## ENN_21_gute_Betreuung 29 58      6.95   0.22
## ENN_27_Zufriedenheit_Insgesamt 30 57      6.89   0.36
## ENN_22_Häusliche_Umgebung_Sicherer_vor_Erregern 31 50      6.78   0.76
## ENN_23_Kontaktvermeidung_andere_Menschen 32 49      5.78   1.40
## ENN_24_Kontaktvermeidung_medizinisches_Personal 33 50      4.82   2.26
## ENN_25_Sorge_vor_Corona 34 50      5.86   1.69
## ENN_26_Videosprechstunde_ähnlich_Termin_vor_Ort 35 57      5.67   1.84
## ENN_28_Zukünftiger_Anspruch 36 57      6.49   1.09
## X          37 2       7.00   0.00
##
## median  trimmed  mad
## ID*      64.5     64.50  21.50
## Gruppe   0.0     0.00   0.00
## ENN_00_Datum_RAW* 32.5     28.19  23.72
## ENN_00_Datum 200868.0 200789.45 368.43
## ENN_1a_Gesprächsteilnehmer 1.0     1.00   0.00
## ENN_1b_Geschlecht 1.0     1.00   0.00
## ENN_1c_Alter 35.0     33.84   4.45
## ENN_1d_Schulbildung_Mutter_in_Jahre 13.0     12.32   1.48
## ENN_1e_beide_Eltern 1.0     0.62   0.00
## ENN_2_Endgerät 1.0     1.53   0.00
## ENN_3_Bisheriger_persönlicher_Besuch_im_SPZ 1.0     0.58   0.00
## ENN_4_Zeit_für_Anfahrt 30.0     27.23  14.83
## ENN_5_Entfernung_km 10.0     13.32  11.12

```

|                                                    |        |        |       |       |
|----------------------------------------------------|--------|--------|-------|-------|
| ## ENN_6_Urlaub_nehmen_für_Termin                  | 0.0    | 0.40   | 0.00  |       |
| ## ENN_7_Potentielle_Wartezeit                     | 15.0   | 18.66  | 14.83 |       |
| ## ENN_8_Aktive_Rolle_Gesundheit_Kind              | 7.0    | 7.00   | 0.00  |       |
| ## ENN_9_Qualität_ENN                              | 7.0    | 6.98   | 0.00  |       |
| ## ENN_10_Zufriedenheit_Video_Audio                | 7.0    | 6.54   | 0.00  |       |
| ## ENN_11_Pünktlichkeit                            | 7.0    | 6.73   | 0.00  |       |
| ## ENN_12_Effizienz                                | 7.0    | 6.96   | 0.00  |       |
| ## ENN_13_Vertrauliche_Weise                       | 7.0    | 7.00   | 0.00  |       |
| ## ENN_14__Sensible_Info                           | 7.0    | 7.00   | 0.00  |       |
| ## ENN_15_Kind_beurteilbar                         | 7.0    | 6.96   | 0.00  |       |
| ## ENN_16_Entspannung_und_Kooperation              | 7.0    | 6.69   | 0.00  |       |
| ## ENN_17_selber_untersuchen                       | 7.0    | 6.87   | 0.00  |       |
| ## ENN_18_Positionswechsel_Erklärungen             | 7.0    | 6.89   | 0.00  |       |
| ## ENN_19_Zeitlicher_Umfang                        | 7.0    | 6.96   | 0.00  |       |
| ## ENN_20_Atmosphäre                               | 7.0    | 7.00   | 0.00  |       |
| ## ENN_21_gute_Betreuung                           | 7.0    | 7.00   | 0.00  |       |
| ## ENN_27_Zufriedenheit_Insgesamt                  | 7.0    | 7.00   | 0.00  |       |
| ## ENN_22_Häusliche_Umgebung_Sicherer_vor_Erregern | 7.0    | 7.00   | 0.00  |       |
| ## ENN_23_Kontaktvermeidung_andere_Menschen        | 6.0    | 5.95   | 1.48  |       |
| ## ENN_24_Kontaktvermeidung_medizinisches_Personal | 5.0    | 5.03   | 2.97  |       |
| ## ENN_25_Sorge_vor_Corona                         | 7.0    | 6.22   | 0.00  |       |
| ## ENN_26_Videosprechstunde_ähnlich_Termin_vor_Ort | 7.0    | 6.00   | 0.00  |       |
| ## ENN_28_Zukünftiger_Anspruch                     | 7.0    | 6.72   | 0.00  |       |
| ## X                                               | 7.0    | 7.00   | 0.00  |       |
| ##                                                 | min    | max    | range | skew  |
| ## ID*                                             | 36     | 93     | 57    | 0.00  |
| ## Gruppe                                          | 0      | 0      | 0     | NaN   |
| ## ENN_00_Datum_RAW*                               | 1      | 57     | 56    | -0.11 |
| ## ENN_00_Datum                                    | 200107 | 201130 | 1023  | -0.39 |
| ## ENN_1a_Gesprächsteilnehmer                      | 1      | 2      | 1     | 4.97  |
| ## ENN_1b_Geschlecht                               | 1      | 2      | 1     | 4.97  |
| ## ENN_1c_Alter                                    | 21     | 42     | 21    | -0.68 |
| ## ENN_1d_Schulbildung_Mutter_in_Jahre             | 4      | 19     | 15    | -0.20 |
| ## ENN_1e_beide_Eltern                             | 0      | 1      | 1     | -0.41 |
| ## ENN_2_Endgerät                                  | 1      | 3      | 2     | 0.80  |
| ## ENN_3_Bisheriger_persönlicher_Besuch_im_SPZ     | 0      | 10     | 10    | 5.72  |
| ## ENN_4_Zeit_für_Anfahrt                          | 4      | 90     | 86    | 1.07  |
| ## ENN_5_Entfernung_km                             | 1      | 70     | 69    | 1.40  |
| ## ENN_6_Urlaub_nehmen_für_Termin                  | 0      | 60     | 60    | 7.05  |
| ## ENN_7_Potentielle_Wartezeit                     | 1      | 180    | 179   | 3.45  |
| ## ENN_8_Aktive_Rolle_Gesundheit_Kind              | 6      | 20     | 14    | 4.90  |
| ## ENN_9_Qualität_ENN                              | 5      | 7      | 2     | -3.16 |
| ## ENN_10_Zufriedenheit_Video_Audio                | 2      | 7      | 5     | -1.65 |
| ## ENN_11_Pünktlichkeit                            | 1      | 7      | 6     | -2.76 |
| ## ENN_12_Effizienz                                | 5      | 7      | 2     | -2.84 |
| ## ENN_13_Vertrauliche_Weise                       | 6      | 7      | 1     | -3.94 |
| ## ENN_14__Sensible_Info                           | 6      | 7      | 1     | -3.31 |
| ## ENN_15_Kind_beurteilbar                         | 4      | 7      | 3     | -2.83 |
| ## ENN_16_Entspannung_und_Kooperation              | 0      | 7      | 7     | -3.28 |
| ## ENN_17_selber_untersuchen                       | 0      | 7      | 7     | -3.76 |
| ## ENN_18_Positionswechsel_Erklärungen             | 0      | 7      | 7     | -4.07 |
| ## ENN_19_Zeitlicher_Umfang                        | 5      | 7      | 2     | -2.81 |
| ## ENN_20_Atmosphäre                               | 5      | 7      | 2     | -3.88 |
| ## ENN_21_gute_Betreuung                           | 6      | 7      | 1     | -3.94 |
| ## ENN_27_Zufriedenheit_Insgesamt                  | 5      | 7      | 2     | -3.53 |
| ## ENN_22_Häusliche_Umgebung_Sicherer_vor_Erregern | 3      | 7      | 4     | -3.66 |

```

## ENN_23_Kontaktvermeidung_andere_Menschen      1      7      6 -1.11
## ENN_24_Kontaktvermeidung_medizinisches_Personal 1      7      6 -0.62
## ENN_25_Sorge_vor_Corona                        1      7      6 -1.55
## ENN_26_Videosprechstunde_ähnlich_Termin_vor_Ort 1      7      6 -1.28
## ENN_28_Zukünftiger_Anspruch                    2      7      5 -2.27
## X                                               7      7      0  NaN
##
##                                kurtosis    se
## ID*                            -1.26    2.22
## Gruppe                          NaN    0.00
## ENN_00_Datum_RAW*               -1.55    2.62
## ENN_00_Datum                    -1.20  44.12
## ENN_1a_Gesprächsteilnehmer     23.11    0.02
## ENN_1b_Geschlecht              23.11    0.02
## ENN_1c_Alter                   -0.19    0.69
## ENN_1d_Schulbildung_Mutter_in_Jahre           1.67    0.37
## ENN_1e_beide_Eltern            -1.86    0.06
## ENN_2_Endgerät                 -1.28    0.12
## ENN_3_Bisheriger_persönlicher_Besuch_im_SPZ   37.22    0.18
## ENN_4_Zeit_für_Anfahrt          2.04    2.15
## ENN_5_Entfernung_km             1.95    1.98
## ENN_6_Urlaub_nehmen_für_Termin   49.40    1.03
## ENN_7_Potentielle_Wartezeit     15.56    3.68
## ENN_8_Aktive_Rolle_Gesundheit_Kind   22.67    0.32
## ENN_9_Qualität_ENN              9.39    0.06
## ENN_10_Zufriedenheit_Video_Audio           1.77    0.17
## ENN_11_Pünktlichkeit            8.41    0.15
## ENN_12_Effizienz                7.87    0.05
## ENN_13_Vertrauliche>Weise       13.79    0.03
## ENN_14__Sensible_Info           9.14    0.03
## ENN_15_Kind_beurteilbar         6.94    0.09
## ENN_16_Entspannung_und_Kooperation   13.67    0.15
## ENN_17_selber_untersuchen        14.30    0.18
## ENN_18_Positionswechsel_Erklärungen   16.55    0.18
## ENN_19_Zeitlicher_Umfang         7.65    0.05
## ENN_20_Atmosphäre              14.30    0.05
## ENN_21_gute_Betreuung           13.79    0.03
## ENN_27_Zufriedenheit_Insgesamt     12.66    0.05
## ENN_22_Häusliche_Umgebung_Sicherer_vor_Erregern 13.15    0.11
## ENN_23_Kontaktvermeidung_andere_Menschen      0.94    0.20
## ENN_24_Kontaktvermeidung_medizinisches_Personal -1.11    0.32
## ENN_25_Sorge_vor_Corona          1.64    0.24
## ENN_26_Videosprechstunde_ähnlich_Termin_vor_Ort 0.59    0.24
## ENN_28_Zukünftiger_Anspruch        4.92    0.14
## X                                 NaN    0.00
## -----
## Gruppe: 1
##
##                                vars  n      mean      sd
## ID*                            1  35      18.00   10.25
## Gruppe                          2  35       1.00    0.00
## ENN_00_Datum_RAW*               3  35      22.26   15.95
## ENN_00_Datum                    4  32  200970.41 1688.90
## ENN_1a_Gesprächsteilnehmer     5  34       1.03    0.17
## ENN_1b_Geschlecht              6  34       1.03    0.17
## ENN_1c_Alter                   7  30      31.40    5.86
## ENN_1d_Schulbildung_Mutter_in_Jahre           8  30      13.20    2.94
## ENN_1e_beide_Eltern            9  35       0.34    0.48

```

|                                                    |      |        |         |              |
|----------------------------------------------------|------|--------|---------|--------------|
| ## ENN_2_Endgerät                                  | 10   | 0      | NaN     | NA           |
| ## ENN_3_Bisheriger_persönlicher_Besuch_im_SPZ     | 11   | 35     | 0.86    | 0.36         |
| ## ENN_4_Zeit_für_Anfahrt                          | 12   | 34     | 29.15   | 15.74        |
| ## ENN_5_Entfernung_km                             | 13   | 34     | 16.65   | 16.34        |
| ## ENN_6_Urlaub_nehmen_für_Termin                  | 14   | 34     | 0.76    | 1.39         |
| ## ENN_7_Potentielle_Wartezeit                     | 15   | 33     | 11.39   | 17.60        |
| ## ENN_8_Aktive_Rolle_Gesundheit_Kind              | 16   | 35     | 6.94    | 1.30         |
| ## ENN_9_Qualität_ENN                              | 17   | 35     | 6.91    | 0.37         |
| ## ENN_10_Zufriedenheit_Video_Audio                | 18   | 6      | 7.00    | 0.00         |
| ## ENN_11_Pünktlichkeit                            | 19   | 31     | 6.58    | 0.76         |
| ## ENN_12_Effizienz                                | 20   | 35     | 6.91    | 0.28         |
| ## ENN_13_Vertrauliche>Weise                       | 21   | 35     | 6.94    | 0.24         |
| ## ENN_14__Sensible_Info                           | 22   | 35     | 6.97    | 0.17         |
| ## ENN_15_Kind_beurteilbar                         | 23   | 35     | 6.94    | 0.24         |
| ## ENN_16_Entspannung_und_Kooperation              | 24   | 35     | 6.34    | 1.08         |
| ## ENN_17_selber_untersuchen                       | 25   | 4      | 6.00    | 0.82         |
| ## ENN_18_Positionswechsel_Erklärungen             | 26   | 0      | NaN     | NA           |
| ## ENN_19_Zeitlicher_Umfang                        | 27   | 31     | 6.71    | 0.82         |
| ## ENN_20_Atmosphäre                               | 28   | 35     | 6.71    | 1.07         |
| ## ENN_21_gute_Betreuung                           | 29   | 35     | 6.94    | 0.24         |
| ## ENN_27_Zufriedenheit_Insgesamt                  | 30   | 35     | 6.97    | 0.17         |
| ## ENN_22_Häusliche_Umgebung_Sicherer_vor_Erregern | 31   | 35     | 6.37    | 1.09         |
| ## ENN_23_Kontaktvermeidung_andere_Menschen        | 32   | 35     | 5.46    | 1.67         |
| ## ENN_24_Kontaktvermeidung_medizinisches_Personal | 33   | 35     | 3.89    | 2.25         |
| ## ENN_25_Sorge_vor_Corona                         | 34   | 35     | 5.31    | 2.03         |
| ## ENN_26_Videosprechstunde_ähnlich_Termin_vor_Ort | 35   | 4      | 5.75    | 1.50         |
| ## ENN_28_Zukünftiger_Anspruch                     | 36   | 0      | NaN     | NA           |
| ## X                                               | 37   | 0      | NaN     | NA           |
| ##                                                 |      | median | trimmed | mad          |
| ## ID*                                             |      | 18.0   | 18.00   | 13.34        |
| ## Gruppe                                          |      | 1.0    | 1.00    | 0.00         |
| ## ENN_00_Datum_RAW*                               |      | 15.0   | 21.34   | 13.34        |
| ## ENN_00_Datum                                    | 2007 | 14.5   | 2006    | 76.00 289.11 |
| ## ENN_1a_Gesprächsteilnehmer                      |      | 1.0    | 1.00    | 0.00         |
| ## ENN_1b_Geschlecht                               |      | 1.0    | 1.00    | 0.00         |
| ## ENN_1c_Alter                                    |      | 31.5   | 31.50   | 5.19         |
| ## ENN_1d_Schulbildung_Mutter_in_Jahre             |      | 13.0   | 13.21   | 3.71         |
| ## ENN_1e_beide_Eltern                             |      | 0.0    | 0.31    | 0.00         |
| ## ENN_2_Endgerät                                  |      | NA     | NaN     | NA           |
| ## ENN_3_Bisheriger_persönlicher_Besuch_im_SPZ     |      | 1.0    | 0.93    | 0.00         |
| ## ENN_4_Zeit_für_Anfahrt                          |      | 30.0   | 27.36   | 14.83        |
| ## ENN_5_Entfernung_km                             |      | 10.5   | 13.79   | 8.90         |
| ## ENN_6_Urlaub_nehmen_für_Termin                  |      | 0.0    | 0.46    | 0.00         |
| ## ENN_7_Potentielle_Wartezeit                     |      | 5.0    | 7.44    | 7.41         |
| ## ENN_8_Aktive_Rolle_Gesundheit_Kind              |      | 7.0    | 7.00    | 0.00         |
| ## ENN_9_Qualität_ENN                              |      | 7.0    | 7.00    | 0.00         |
| ## ENN_10_Zufriedenheit_Video_Audio                |      | 7.0    | 7.00    | 0.00         |
| ## ENN_11_Pünktlichkeit                            |      | 7.0    | 6.76    | 0.00         |
| ## ENN_12_Effizienz                                |      | 7.0    | 7.00    | 0.00         |
| ## ENN_13_Vertrauliche>Weise                       |      | 7.0    | 7.00    | 0.00         |
| ## ENN_14__Sensible_Info                           |      | 7.0    | 7.00    | 0.00         |
| ## ENN_15_Kind_beurteilbar                         |      | 7.0    | 7.00    | 0.00         |
| ## ENN_16_Entspannung_und_Kooperation              |      | 7.0    | 6.55    | 0.00         |
| ## ENN_17_selber_untersuchen                       |      | 6.0    | 6.00    | 0.74         |
| ## ENN_18_Positionswechsel_Erklärungen             |      | NA     | NaN     | NA           |
| ## ENN_19_Zeitlicher_Umfang                        |      | 7.0    | 6.92    | 0.00         |

|                                                    |          |        |       |       |
|----------------------------------------------------|----------|--------|-------|-------|
| ## ENN_20_Atmosphäre                               | 7.0      | 6.97   | 0.00  |       |
| ## ENN_21_gute_Betreuung                           | 7.0      | 7.00   | 0.00  |       |
| ## ENN_27_Zufriedenheit_Insgesamt                  | 7.0      | 7.00   | 0.00  |       |
| ## ENN_22_Häusliche_Umgebung_Sicherer_vor_Erregern | 7.0      | 6.59   | 0.00  |       |
| ## ENN_23_Kontaktvermeidung_andere_Menschen        | 6.0      | 5.69   | 1.48  |       |
| ## ENN_24_Kontaktvermeidung_medizinisches_Personal | 4.0      | 3.86   | 2.97  |       |
| ## ENN_25_Sorge_vor_Corona                         | 6.0      | 5.59   | 1.48  |       |
| ## ENN_26_Videosprechstunde_ähnlich_Termin_vor_Ort | 6.0      | 5.75   | 1.48  |       |
| ## ENN_28_Zukünftiger_Anspruch                     | NA       | NaN    | NA    |       |
| ## X                                               | NA       | NaN    | NA    |       |
| ##                                                 | min      | max    | range | skew  |
| ## ID*                                             | 1        | 35     | 34    | 0.00  |
| ## Gruppe                                          | 1        | 1      | 0     | NaN   |
| ## ENN_00_Datum_RAW*                               | 1        | 55     | 54    | 0.63  |
| ## ENN_00_Datum                                    | 200207   | 210125 | 9918  | 4.96  |
| ## ENN_1a_Gesprächsteilnehmer                      | 1        | 2      | 1     | 5.33  |
| ## ENN_1b_Geschlecht                               | 1        | 2      | 1     | 5.33  |
| ## ENN_1c_Alter                                    | 19       | 47     | 28    | 0.08  |
| ## ENN_1d_Schulbildung_Mutter_in_Jahre             | 8        | 18     | 10    | -0.02 |
| ## ENN_1e_beide_Eltern                             | 0        | 1      | 1     | 0.63  |
| ## ENN_2_Endgerät                                  | Inf      | -Inf   | -Inf  | NA    |
| ## ENN_3_Bisheriger_persönlicher_Besuch_im_SPZ     | 0        | 1      | 1     | -1.95 |
| ## ENN_4_Zeit_für_Anfahrt                          | 10       | 75     | 65    | 1.12  |
| ## ENN_5_Entfernung_km                             | 2        | 75     | 73    | 1.89  |
| ## ENN_6_Urlaub_nehmen_für_Termin                  | 0        | 5      | 5     | 1.84  |
| ## ENN_7_Potentielle_Wartezeit                     | 0        | 70     | 70    | 1.96  |
| ## ENN_8_Aktive_Rolle_Gesundheit_Kind              | 1        | 10     | 9     | -2.06 |
| ## ENN_9_Qualität_ENN                              | 5        | 7      | 2     | -4.25 |
| ## ENN_10_Zufriedenheit_Video_Audio                | 7        | 7      | 0     | NaN   |
| ## ENN_11_Pünktlichkeit                            | 4        | 7      | 3     | -1.78 |
| ## ENN_12_Effizienz                                | 6        | 7      | 1     | -2.83 |
| ## ENN_13_Vertrauliche>Weise                       | 6        | 7      | 1     | -3.65 |
| ## ENN_14__Sensible_Info                           | 6        | 7      | 1     | -5.42 |
| ## ENN_15_Kind_beurteilbar                         | 6        | 7      | 1     | -3.65 |
| ## ENN_16_Entspannung_und_Kooperation              | 3        | 7      | 4     | -1.63 |
| ## ENN_17_selber_untersuchen                       | 5        | 7      | 2     | 0.00  |
| ## ENN_18_Positionswechsel_Erklärungen             | Inf      | -Inf   | -Inf  | NA    |
| ## ENN_19_Zeitlicher_Umfang                        | 3        | 7      | 4     | -3.25 |
| ## ENN_20_Atmosphäre                               | 1        | 7      | 6     | -4.43 |
| ## ENN_21_gute_Betreuung                           | 6        | 7      | 1     | -3.65 |
| ## ENN_27_Zufriedenheit_Insgesamt                  | 6        | 7      | 1     | -5.42 |
| ## ENN_22_Häusliche_Umgebung_Sicherer_vor_Erregern | 3        | 7      | 4     | -1.55 |
| ## ENN_23_Kontaktvermeidung_andere_Menschen        | 1        | 7      | 6     | -0.94 |
| ## ENN_24_Kontaktvermeidung_medizinisches_Personal | 1        | 7      | 6     | -0.13 |
| ## ENN_25_Sorge_vor_Corona                         | 1        | 7      | 6     | -0.83 |
| ## ENN_26_Videosprechstunde_ähnlich_Termin_vor_Ort | 4        | 7      | 3     | -0.14 |
| ## ENN_28_Zukünftiger_Anspruch                     | Inf      | -Inf   | -Inf  | NA    |
| ## X                                               | Inf      | -Inf   | -Inf  | NA    |
| ##                                                 | kurtosis | se     |       |       |
| ## ID*                                             | -1.30    | 1.73   |       |       |
| ## Gruppe                                          | NaN      | 0.00   |       |       |
| ## ENN_00_Datum_RAW*                               | -0.92    | 2.70   |       |       |
| ## ENN_00_Datum                                    | 23.98    | 298.56 |       |       |
| ## ENN_1a_Gesprächsteilnehmer                      | 27.17    | 0.03   |       |       |
| ## ENN_1b_Geschlecht                               | 27.17    | 0.03   |       |       |
| ## ENN_1c_Alter                                    | 0.43     | 1.07   |       |       |



|                                                    |       |      |
|----------------------------------------------------|-------|------|
| ## ENN_1d_Schulbildung_Mutter_in_Jahre             | -1.01 | 0.54 |
| ## ENN_1e_beide_Eltern                             | -1.64 | 0.08 |
| ## ENN_2_Endgerät                                  | NA    | NA   |
| ## ENN_3_Bisheriger_persönlicher_Besuch_im_SPZ     | 1.88  | 0.06 |
| ## ENN_4_Zeit_für_Anfahrt                          | 0.80  | 2.70 |
| ## ENN_5_Entfernung_km                             | 3.55  | 2.80 |
| ## ENN_6_Urlaub_nehmen_für_Termin                  | 2.14  | 0.24 |
| ## ENN_7_Potentielle_Wartezeit                     | 3.07  | 3.06 |
| ## ENN_8_Aktive_Rolle_Gesundheit_Kind              | 11.16 | 0.22 |
| ## ENN_9_Qualität_ENN                              | 17.75 | 0.06 |
| ## ENN_10_Zufriedenheit_Video_Audio                | NaN   | 0.00 |
| ## ENN_11_Pünktlichkeit                            | 2.49  | 0.14 |
| ## ENN_12_Effizienz                                | 6.21  | 0.05 |
| ## ENN_13_Vertrauliche>Weise                       | 11.68 | 0.04 |
| ## ENN_14__Sensible_Info                           | 28.17 | 0.03 |
| ## ENN_15_Kind_beurteilbar                         | 11.68 | 0.04 |
| ## ENN_16_Entspannung_und_Kooperation              | 1.62  | 0.18 |
| ## ENN_17_selber_untersuchen                       | -1.88 | 0.41 |
| ## ENN_18_Positionswechsel_Erklärungen             | NA    | NA   |
| ## ENN_19_Zeitlicher_Umfang                        | 10.89 | 0.15 |
| ## ENN_20_Atmosphäre                               | 20.19 | 0.18 |
| ## ENN_21_gute_Betreuung                           | 11.68 | 0.04 |
| ## ENN_27_Zufriedenheit_Insgesamt                  | 28.17 | 0.03 |
| ## ENN_22_Häusliche_Umgebung_Sicherer_vor_Erregern | 1.31  | 0.18 |
| ## ENN_23_Kontaktvermeidung_andere_Menschen        | 0.00  | 0.28 |
| ## ENN_24_Kontaktvermeidung_medizinisches_Personal | -1.45 | 0.38 |
| ## ENN_25_Sorge_vor_Corona                         | -0.63 | 0.34 |
| ## ENN_26_Videosprechstunde_ähnlich_Termin_vor_Ort | -2.28 | 0.75 |
| ## ENN_28_Zukünftiger_Anspruch                     | NA    | NA   |
| ## X                                               | NA    | NA   |

## 2 normal distribution

### 2.1 video consulting

```
VideoAppointment <- subset(ENN, ENN$Gruppe == 0)
shapiro.test(VideoAppointment$ENN_8_Aktive_Rolle_Gesundheit_Kind)
```

```
##
## Shapiro-Wilk normality test
##
## data:  VideoAppointment$ENN_8_Aktive_Rolle_Gesundheit_Kind
## W = 0.21578, p-value = 5.542e-16
```

```
shapiro.test(VideoAppointment$ENN_9_Qualität_ENN)
```

```
##
## Shapiro-Wilk normality test
##
## data:  VideoAppointment$ENN_9_Qualität_ENN
## W = 0.35277, p-value = 1.467e-14
```

```
shapiro.test(VideoAppointment$ENN_10_Zufriedenheit_Video_Audio)
```

```
##  
## Shapiro-Wilk normality test  
##  
## data: VideoAppointment$ENN_10_Zufriedenheit_Video_Audio  
## W = 0.6269, p-value = 6.987e-11
```

```
shapiro.test(VideoAppointment$ENN_11_Punktlichkeit)
```

```
##  
## Shapiro-Wilk normality test  
##  
## data: VideoAppointment$ENN_11_Punktlichkeit  
## W = 0.54092, p-value = 3.388e-12
```

```
shapiro.test(VideoAppointment$ENN_12_Effizienz)
```

```
##  
## Shapiro-Wilk normality test  
##  
## data: VideoAppointment$ENN_12_Effizienz  
## W = 0.39056, p-value = 3.956e-14
```

```
shapiro.test(VideoAppointment$ENN_13_Vertrauliche_Weise)
```

```
##  
## Shapiro-Wilk normality test  
##  
## data: VideoAppointment$ENN_13_Vertrauliche_Weise  
## W = 0.23178, p-value = 7.941e-16
```

```
shapiro.test(VideoAppointment$ENN_14__Sensible_Info)
```

```
##  
## Shapiro-Wilk normality test  
##  
## data: VideoAppointment$ENN_14__Sensible_Info  
## W = 0.27643, p-value = 2.234e-15
```

```
shapiro.test(VideoAppointment$ENN_15_Kind_beurteilbar)
```

```
##  
## Shapiro-Wilk normality test  
##  
## data: VideoAppointment$ENN_15_Kind_beurteilbar  
## W = 0.38518, p-value = 3.426e-14
```

```
shapiro.test(VideoAppointment$ENN_16_Entspannung_und_Kooperation)
```

```
##  
## Shapiro-Wilk normality test  
##  
## data: VideoAppointment$ENN_16_Entspannung_und_Kooperation  
## W = 0.52975, p-value = 2.356e-12
```

```
shapiro.test(VideoAppointment$ENN_17_selber_untersuchen)
```

```
##  
## Shapiro-Wilk normality test  
##  
## data: VideoAppointment$ENN_17_selber_untersuchen  
## W = 0.38541, p-value = 4.58e-14
```

```
shapiro.test(VideoAppointment$ENN_18_Positionswechsel_Erklärungen)
```

```
##  
## Shapiro-Wilk normality test  
##  
## data: VideoAppointment$ENN_18_Positionswechsel_Erklärungen  
## W = 0.3486, p-value = 2.36e-14
```

```
shapiro.test(VideoAppointment$ENN_19_Zeitlicher_Umfang)
```

```
##  
## Shapiro-Wilk normality test  
##  
## data: VideoAppointment$ENN_19_Zeitlicher_Umfang  
## W = 0.39456, p-value = 5.844e-14
```

```
shapiro.test(VideoAppointment$ENN_20_Atmosphäre)
```

```
##  
## Shapiro-Wilk normality test  
##  
## data: VideoAppointment$ENN_20_Atmosphäre  
## W = 0.27401, p-value = 2.11e-15
```

```
shapiro.test(VideoAppointment$ENN_21_gute_Betreuung)
```

```
##  
## Shapiro-Wilk normality test  
##  
## data: VideoAppointment$ENN_21_gute_Betreuung  
## W = 0.23178, p-value = 7.941e-16
```

```
shapiro.test(VideoAppointment$ENN_22_Häusliche_Umgebung_Sicherer_vor_Erregern)
```

```
##  
## Shapiro-Wilk normality test  
##  
## data: VideoAppointment$ENN_22_Häusliche_Umgebung_Sicherer_vor_Erregern  
## W = 0.3274, p-value = 8.761e-14
```

```
shapiro.test(VideoAppointment$ENN_23_Kontaktvermeidung_andere_Menschen)
```

```
##  
## Shapiro-Wilk normality test  
##  
## data: VideoAppointment$ENN_23_Kontaktvermeidung_andere_Menschen  
## W = 0.82023, p-value = 3.193e-06
```

```
shapiro.test(VideoAppointment$ENN_24_Kontaktvermeidung_medizinisches_Personal)
```

```
##  
## Shapiro-Wilk normality test  
##  
## data: VideoAppointment$ENN_24_Kontaktvermeidung_medizinisches_Personal  
## W = 0.82318, p-value = 3.133e-06
```

```
shapiro.test(VideoAppointment$ENN_25_Sorge_vor_Corona)
```

```
##  
## Shapiro-Wilk normality test  
##  
## data: VideoAppointment$ENN_25_Sorge_vor_Corona  
## W = 0.71129, p-value = 1.327e-08
```

```
shapiro.test(VideoAppointment$ENN_26_Videosprechstunde_ähnlich_Termin_vor_Ort)
```

```
##  
## Shapiro-Wilk normality test  
##  
## data: VideoAppointment$ENN_26_Videosprechstunde_ähnlich_Termin_vor_Ort  
## W = 0.7441, p-value = 1.277e-08
```

```
shapiro.test(VideoAppointment$ENN_27_Zufriedenheit_Insgesamt)
```

```
##  
## Shapiro-Wilk normality test  
##  
## data: VideoAppointment$ENN_27_Zufriedenheit_Insgesamt  
## W = 0.32205, p-value = 9.057e-15
```

```
shapiro.test(VideoAppointment$ENN_28_Zukünftiger_Anspruch)
```

```
##  
## Shapiro-Wilk normality test  
##  
## data: VideoAppointment$ENN_28_Zukünftiger_Anspruch  
## W = 0.53889, p-value = 4.1e-12
```

Keine Variable ist normalverteilt.

## 2.2 in person appointment

```
RealAppointment <- subset(ENN, ENN$Gruppe == 1)
```

```
shapiro.test(RealAppointment$ENN_8_Aktive_Rolle_Gesundheit_Kind)
```

```
##  
## Shapiro-Wilk normality test  
##  
## data: RealAppointment$ENN_8_Aktive_Rolle_Gesundheit_Kind  
## W = 0.43481, p-value = 1.789e-10
```

```
shapiro.test(RealAppointment$ENN_9_Qualität_ENN)
```

```
##  
## Shapiro-Wilk normality test  
##  
## data: RealAppointment$ENN_9_Qualität_ENN  
## W = 0.24711, p-value = 3.21e-12
```

```
shapiro.test(RealAppointment$ENN_11_Pünktlichkeit)
```

```
##  
## Shapiro-Wilk normality test  
##  
## data: RealAppointment$ENN_11_Pünktlichkeit  
## W = 0.61382, p-value = 7.765e-08
```

```
shapiro.test(RealAppointment$ENN_12_Effizienz)
```

```
##  
## Shapiro-Wilk normality test  
##  
## data: RealAppointment$ENN_12_Effizienz  
## W = 0.31688, p-value = 1.305e-11
```

```
shapiro.test(RealAppointment$ENN_13_Vertrauliche>Weise)
```

```
##  
## Shapiro-Wilk normality test  
##  
## data: RealAppointment$ENN_13_Vertrauliche_Weise  
## W = 0.24996, p-value = 3.394e-12
```

```
shapiro.test(RealAppointment$ENN_14__Sensible_Info)
```

```
##  
## Shapiro-Wilk normality test  
##  
## data: RealAppointment$ENN_14__Sensible_Info  
## W = 0.16146, p-value = 6.472e-13
```

```
shapiro.test(RealAppointment$ENN_15_Kind_beurteilbar)
```

```
##  
## Shapiro-Wilk normality test  
##  
## data: RealAppointment$ENN_15_Kind_beurteilbar  
## W = 0.24996, p-value = 3.394e-12
```

```
shapiro.test(RealAppointment$ENN_16_Entspannung_und_Kooperation)
```

```
##  
## Shapiro-Wilk normality test  
##  
## data: RealAppointment$ENN_16_Entspannung_und_Kooperation  
## W = 0.65743, p-value = 8.649e-08
```

```
shapiro.test(RealAppointment$ENN_19_Zeitlicher_Umfang)
```

```
##  
## Shapiro-Wilk normality test  
##  
## data: RealAppointment$ENN_19_Zeitlicher_Umfang  
## W = 0.41274, p-value = 4.839e-10
```

```
shapiro.test(RealAppointment$ENN_20_Atmosphäre)
```

```
##  
## Shapiro-Wilk normality test  
##  
## data: RealAppointment$ENN_20_Atmosphäre  
## W = 0.29854, p-value = 8.945e-12
```

```
shapiro.test(RealAppointment$ENN_21_gute_Betreuung)
```

```
##  
## Shapiro-Wilk normality test  
##  
## data: RealAppointment$ENN_21_gute_Betreuung  
## W = 0.24996, p-value = 3.394e-12
```

```
shapiro.test(RealAppointment$ENN_22_Häusliche_Umgebung_Sicherer_vor_Erregern)
```

```
##  
## Shapiro-Wilk normality test  
##  
## data: RealAppointment$ENN_22_Häusliche_Umgebung_Sicherer_vor_Erregern  
## W = 0.64463, p-value = 5.702e-08
```

```
shapiro.test(RealAppointment$ENN_23_Kontaktvermeidung_andere_Menschen)
```

```
##  
## Shapiro-Wilk normality test  
##  
## data: RealAppointment$ENN_23_Kontaktvermeidung_andere_Menschen  
## W = 0.84576, p-value = 0.000185
```

```
shapiro.test(RealAppointment$ENN_24_Kontaktvermeidung_medizinisches_Personal)
```

```
##  
## Shapiro-Wilk normality test  
##  
## data: RealAppointment$ENN_24_Kontaktvermeidung_medizinisches_Personal  
## W = 0.85388, p-value = 0.0002827
```

```
shapiro.test(RealAppointment$ENN_25_Sorge_vor_Corona)
```

```
##  
## Shapiro-Wilk normality test  
##  
## data: RealAppointment$ENN_25_Sorge_vor_Corona  
## W = 0.79754, p-value = 1.827e-05
```

```
shapiro.test(RealAppointment$ENN_27_Zufriedenheit_Insgesamt)
```

```
##  
## Shapiro-Wilk normality test  
##  
## data: RealAppointment$ENN_27_Zufriedenheit_Insgesamt  
## W = 0.16146, p-value = 6.472e-13
```

No variable is normally distributed.

# 3 GROUP DIFFERENCES: Calculated group differences between a video consultation and an outpatient appointment.

## 3.1 Mann-Whitney U test

## 3.2 First significant difference

```
describeBy(ENN$ENN_1c_Alter, ENN$Gruppe)
```

```
##  
## Descriptive statistics by group  
## group: 0  
## vars n mean sd median trimmed mad min max range skew kurtosis se  
## X1 1 55 33.45 5.11 35 33.84 4.45 21 42 21 -0.68 -0.19 0.69  
## -----  
## group: 1  
## vars n mean sd median trimmed mad min max range skew kurtosis se  
## X1 1 30 31.4 5.86 31.5 31.5 5.19 19 47 28 0.08 0.43 1.07
```

```
boxplot(ENN_1c_Alter ~ Gruppe, data=ENN)
```

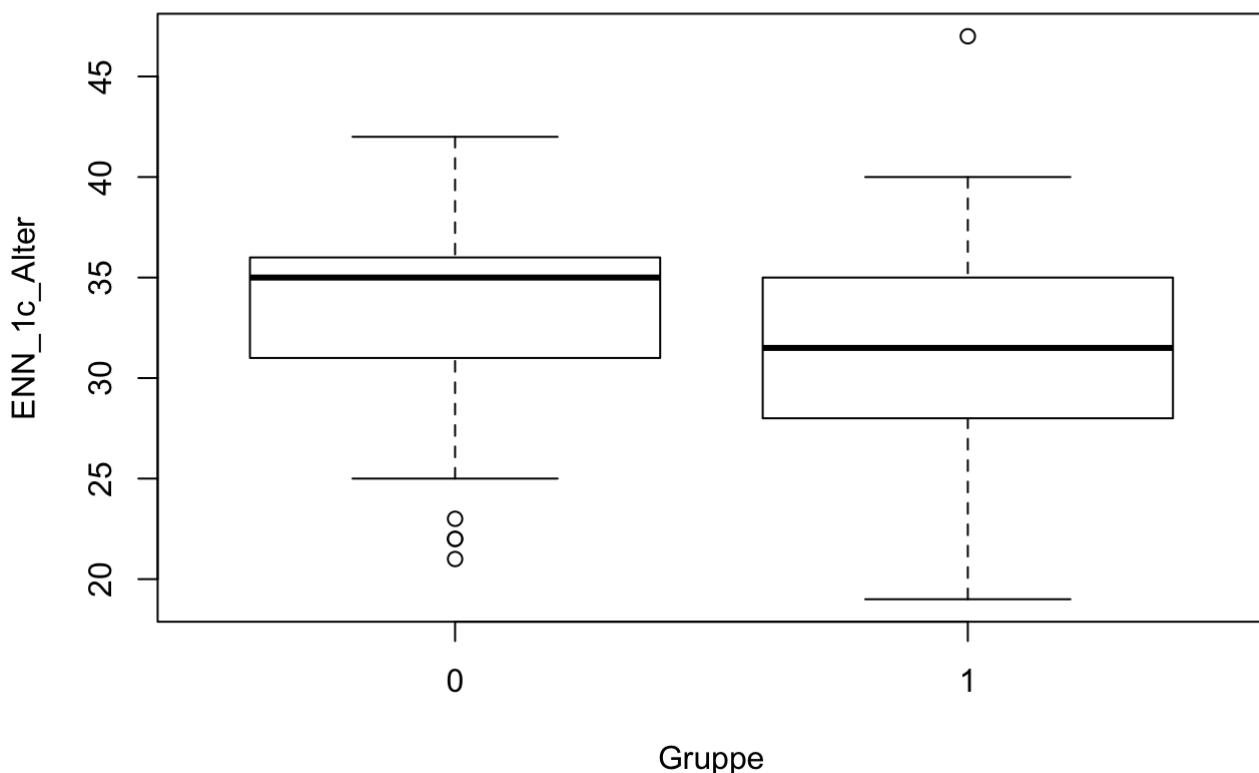



```
wilcox.test(ENN_1c_Alter ~ Gruppe, data=ENN, exact=FALSE, correct = FALSE, conf.int=TRUE)
```

```
##  
## Wilcoxon rank sum test  
##  
## data: ENN_1c_Alter by Gruppe  
## W = 1043, p-value = 0.04413  
## alternative hypothesis: true location shift is not equal to 0  
## 95 percent confidence interval:  
## 1.210346e-05 4.999981e+00  
## sample estimates:  
## difference in location  
## 2.999965
```

There is a significant difference between the groups.

Calculate effect size  $r$  (effect size according to Cohen: 0.1-0.29=small; 0.3-0.40=medium; > 0.5=strong)

```
z <- qnorm(0.04413)  
r <- z/sqrt(93)  
r
```

```
## [1] -0.1767638
```

There is a small effect between the groups.

```
ggplot(data=ENN, mapping=aes(x=Gruppe, y=ENN_1c_Alter)) +  
  stat_summary(fun.data=mean_sdl, geom="bar") +  
  theme_classic()+  
  labs(title="Differences in age between video consultation and real appointment groups", x="Gruppe", y="Alter in Jahren")
```

```
## Warning: Removed 8 rows containing non-finite values (stat_summary).
```

## Differences in age between video consultation and real appointment groups

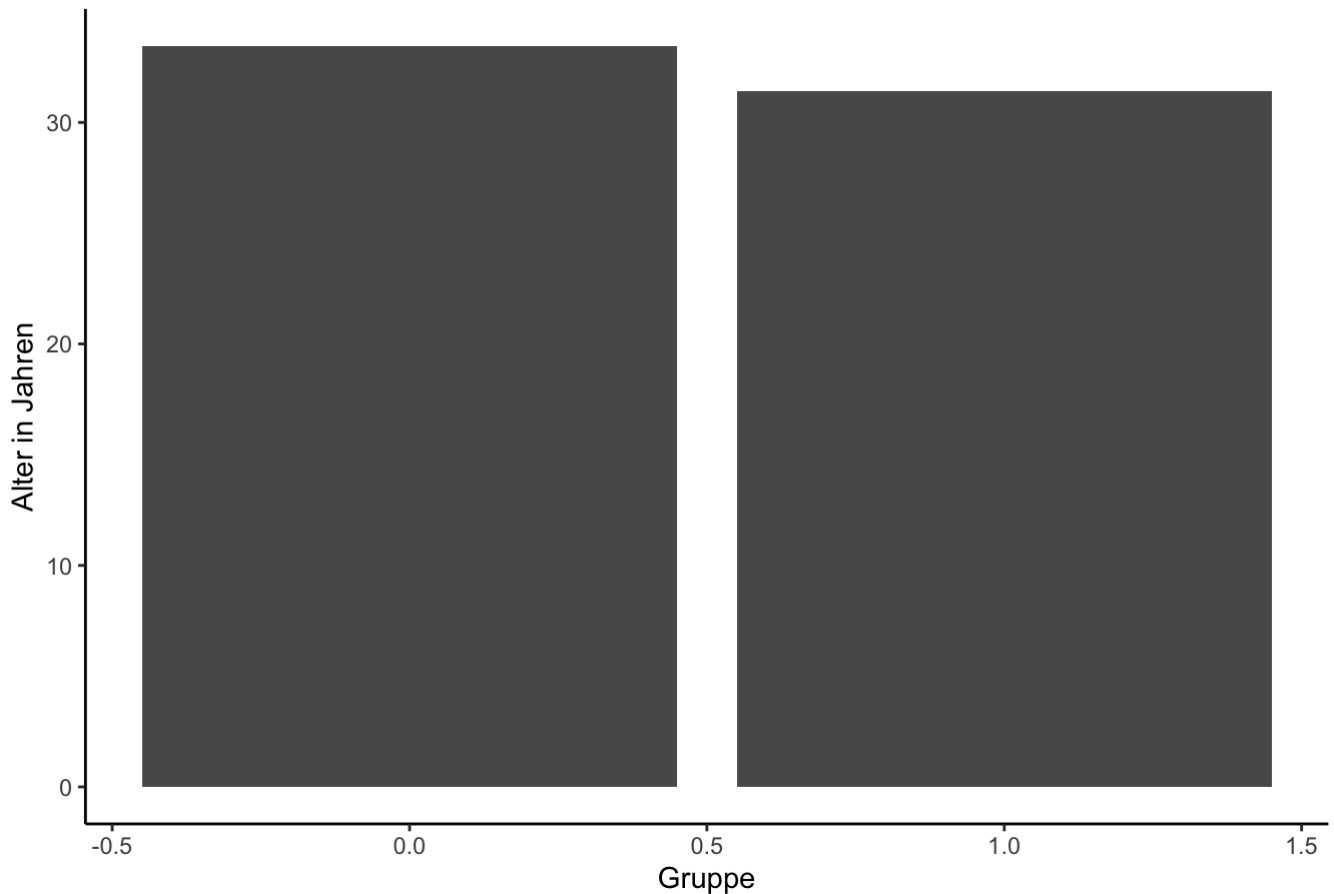

```
describeBy(ENNENN1ccAlter, ENNGruppe) boxplot(ENN_1cc_Alter ~ Gruppe, data=ENN)
wilcox.test(ENN_1cc_Alter ~ Gruppe, data=ENN, exact=FALSE, correct = FALSE, conf.int=TRUE) ### There is
no significant difference between the groups.
```

```
describeBy(ENNENN1dsschulbildung_Mutter_in_Jahre, ENNGruppe)
boxplot(ENN_1d_Schulbildung_Mutter_in_Jahre ~ Gruppe, data=ENN)
wilcox.test(ENN_1d_Schulbildung_Mutter_in_Jahre ~ Gruppe, data=ENN, exact=FALSE, correct = FALSE,
conf.int=TRUE) ### There is no significant difference between the groups.
```

```
describeBy(ENNENN1ddschulbildung_Vater_in_Jahren, ENNGruppe)
boxplot(ENN_1dd_Schulbildung_Vater_in_Jahren ~ Gruppe, data=ENN)
wilcox.test(ENN_1dd_Schulbildung_Vater_in_Jahren ~ Gruppe, data=ENN, exact=FALSE, correct = FALSE,
conf.int=TRUE) ### There is no significant difference between the groups.
```

```
describeBy(ENN[ENN_6_Urlaub_nehmen_für_Termin, ENN]Gruppe)
boxplot(ENN_6_Urlaub_nehmen_für_Termin ~ Gruppe, data=ENN)
wilcox.test(ENN_6_Urlaub_nehmen_für_Termin ~ Gruppe, data=ENN, exact=FALSE, correct = FALSE,
conf.int=TRUE) ### There is no significant difference between the groups.
```

## 3.3 Second significant difference

```
describeBy(ENN$ENN_7_Potentielle_Wartezeit, ENN$Gruppe)
```

```
##
## Descriptive statistics by group
## group: 0
##   vars  n  mean    sd median trimmed  mad min max range skew kurtosis  se
## X1    1 57 23.58 27.75     15  18.66 14.83   1 180  179 3.45    15.56 3.68
## -----
## group: 1
##   vars  n  mean    sd median trimmed  mad min max range skew kurtosis  se
## X1    1 33 11.39 17.6     5   7.44 7.41   0  70   70 1.96     3.07 3.06
```

```
boxplot(ENN_7_Potentielle_Wartezeit ~ Gruppe, data=ENN)
```

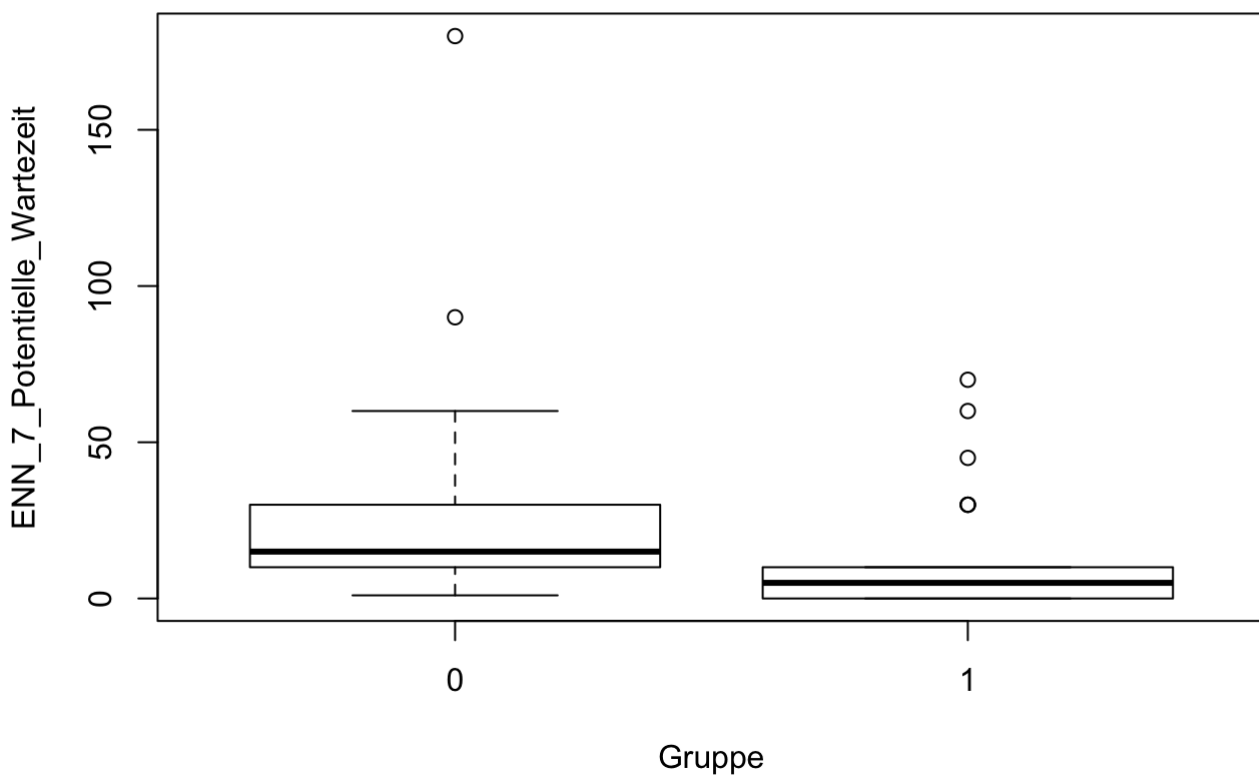

```
wilcox.test(ENN_7_Potentielle_Wartezeit ~ Gruppe, data=ENN, exact=FALSE, correct = FALSE, conf.int=TRUE)
```

```
##
## Wilcoxon rank sum test
##
## data: ENN_7_Potentielle_Wartezeit by Gruppe
## W = 1387.5, p-value = 0.0001541
## alternative hypothesis: true location shift is not equal to 0
## 95 percent confidence interval:
##  4.999957 14.999983
## sample estimates:
## difference in location
##                9.999962
```

There is a significant difference between the groups.

Calculate effect size r (effect size according to Cohen: 0.1-0.29=small; 0.3-0.40=medium; > 0.5=strong)

```
z <- qnorm(0.0002289)
r <- z/sqrt(93)
r
```

```
## [1] -0.3633795
```

There is a medium effect between groups.

```
ggplot(data=ENN, mapping=aes(x=Gruppe, y=ENN_7_Potentielle_Wartezeit)) +
  stat_summary(fun.data=mean_sdl, geom="bar") +
  theme_classic()+
  labs(title="Differences in potential waiting time between video consultation and real appointment groups.", x="Gruppe", y="Wartezeit in Minuten")
```

```
## Warning: Removed 3 rows containing non-finite values (stat_summary).
```

Differences in potential waiting time between video consultation and real appointment groups

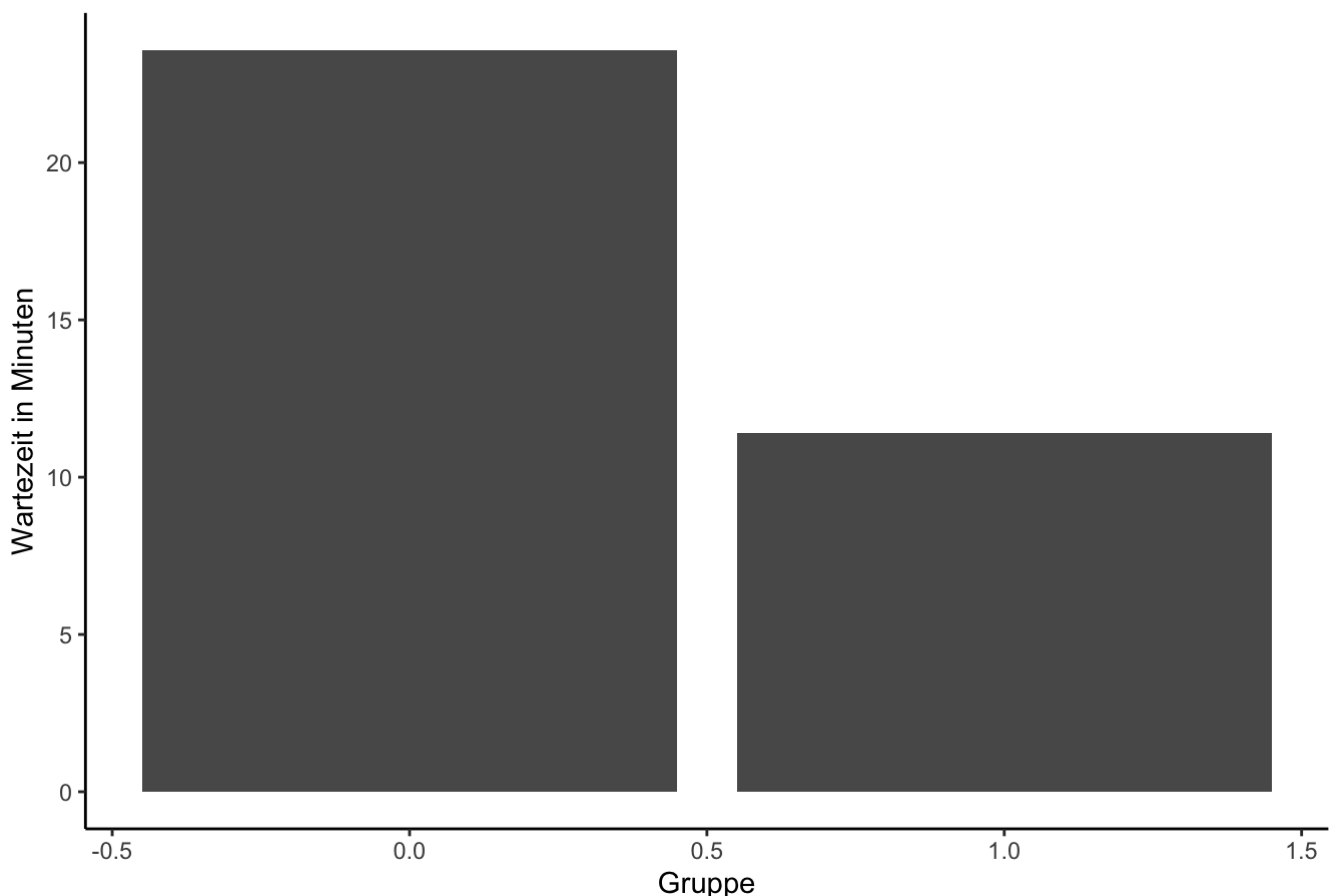

```
describeBy(ENN[ENN_8_Aktive_Rolle_Gesundheit_Kind, ENN][Gruppe])
boxplot(ENN_8_Aktive_Rolle_Gesundheit_Kind ~ Gruppe, data=ENN)
wilcox.test(ENN_8_Aktive_Rolle_Gesundheit_Kind ~ Gruppe, data=ENN, exact=FALSE, correct = FALSE,
conf.int=TRUE) ### There is no significant difference between the groups.
```

```
describeBy(ENN[ENN_9_Qualität_ENN, ENN][Gruppe])
boxplot(ENN_9_Qualität_ENN ~ Gruppe, data=ENN)
wilcox.test(ENN_9_Qualität_ENN ~ Gruppe, data=ENN, exact=FALSE, correct = FALSE, conf.int=TRUE) ###
There is no significant difference between the groups.
```

```
describeBy(ENNENN11_Pünktlichkeit, ENNGruppe) boxplot(ENN_11_Pünktlichkeit ~ Gruppe, data=ENN)
wilcox.test(ENN_11_Pünktlichkeit ~ Gruppe, data=ENN, exact=FALSE, correct = FALSE, conf.int=TRUE) ###
There is no significant difference between the groups.
```

```
describeBy(ENNENN12_Effizienz, ENNGruppe) boxplot(ENN_12_Effizienz ~ Gruppe, data=ENN)
wilcox.test(ENN_12_Effizienz ~ Gruppe, data=ENN, exact=FALSE, correct = FALSE, conf.int=TRUE) ###
There is no significant difference between the groups.
```

```
describeBy(ENNENN13_VertraulicheWeise, ENNGruppe) boxplot(ENN_13_Vertrauliche_Weise ~ Gruppe,
data=ENN) wilcox.test(ENN_13_Vertrauliche_Weise ~ Gruppe, data=ENN, exact=FALSE, correct = FALSE,
conf.int=TRUE) ###
There is no significant difference between the groups.
```

```
describeBy(ENN[ENN_14__Sensible_Info, ENN]Gruppe) boxplot(ENN_14__Sensible_Info ~ Gruppe, data=ENN)
wilcox.test(ENN_14__Sensible_Info ~ Gruppe, data=ENN, exact=FALSE, correct = FALSE, conf.int=TRUE) ###
There is no significant difference between the groups.
```

```
describeBy(ENNENN15_Kind_beurteilbar, ENNGruppe) boxplot(ENN_15_Kind_beurteilbar ~ Gruppe,
data=ENN) wilcox.test(ENN_15_Kind_beurteilbar ~ Gruppe, data=ENN, exact=FALSE, correct = FALSE,
conf.int=TRUE) ###
There is no significant difference between the groups.
```

```
describeBy(ENNENN16_Entspannung_und_Kooperation, ENNGruppe)
boxplot(ENN_16_Entspannung_und_Kooperation ~ Gruppe, data=ENN)
wilcox.test(ENN_16_Entspannung_und_Kooperation ~ Gruppe, data=ENN, exact=FALSE, correct = FALSE,
conf.int=TRUE) ###
There is no significant difference between the groups.
```

```
describeBy(ENNENN19_Zeitlicher_Umfang, ENNGruppe) boxplot(ENN_19_Zeitlicher_Umfang ~ Gruppe,
data=ENN) wilcox.test(ENN_19_Zeitlicher_Umfang ~ Gruppe, data=ENN, exact=FALSE, correct = FALSE,
conf.int=TRUE) ###
There is no significant difference between the groups.
```

```
describeBy(ENNENN20_Atmosphäre, ENNGruppe) boxplot(ENN_20_Atmosphäre ~ Gruppe, data=ENN)
wilcox.test(ENN_20_Atmosphäre ~ Gruppe, data=ENN, exact=FALSE, correct = FALSE, conf.int=TRUE) ###
There is no significant difference between the groups.
```

```
describeBy(ENNENN21_gute_Betreuung, ENNGruppe) boxplot(ENN_21_gute_Betreuung ~ Gruppe,
data=ENN) wilcox.test(ENN_21_gute_Betreuung ~ Gruppe, data=ENN, exact=FALSE, correct = FALSE,
conf.int=TRUE) ###
There is no significant difference between the groups.
```

## 3.4 Third significant difference

```
describeBy(ENN$ENN_22_Häusliche_Umgebung_Sicherer_vor_Erregern, ENN$Gruppe)
```

```
##
## Descriptive statistics by group
## group: 0
##   vars  n mean   sd median trimmed mad min max range  skew kurtosis  se
## X1    1 50 6.78 0.76      7      7  0  3  7    4 -3.66   13.15 0.11
## -----
## group: 1
##   vars  n mean   sd median trimmed mad min max range  skew kurtosis  se
## X1    1 35 6.37 1.09      7    6.59  0  3  7    4 -1.55    1.31 0.18
```

```
boxplot(ENN_22_Häusliche_Umgebung_Sicherer_vor_Erregern ~ Gruppe, data=ENN)
```

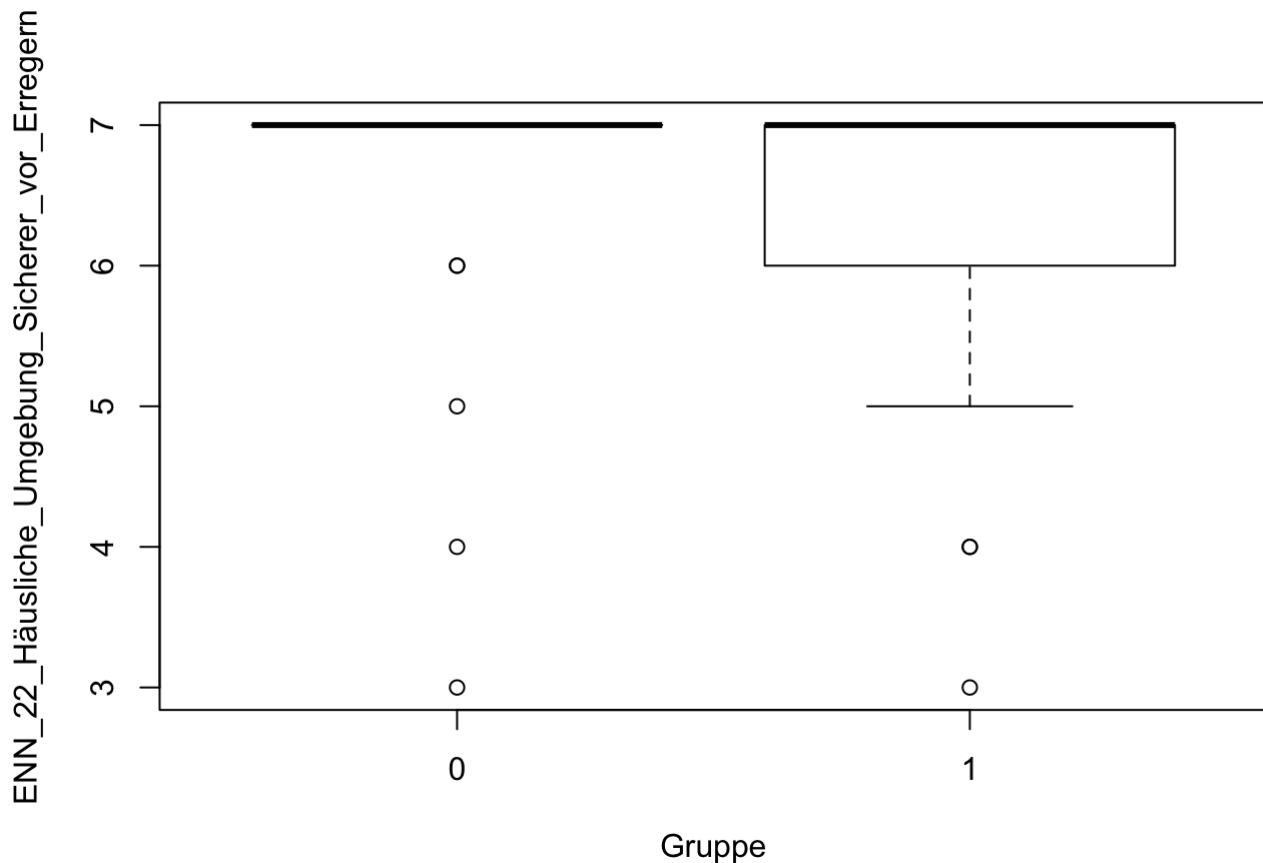

```
wilcox.test(ENN_22_Häusliche_Umgebung_Sicherer_vor_Erregern ~ Gruppe, data=ENN, exact =FALSE, correct = FALSE, conf.int=TRUE)
```

```
##
## Wilcoxon rank sum test
##
## data: ENN_22_Häusliche_Umgebung_Sicherer_vor_Erregern by Gruppe
## W = 1060.5, p-value = 0.01509
## alternative hypothesis: true location shift is not equal to 0
## 95 percent confidence interval:
## -4.846475e-05 7.294688e-05
## sample estimates:
## difference in location
## 4.095156e-05
```

There is a significant difference between the groups.

Calculate effect size r (effect size according to Cohen: 0.1-0.29=small; 0.3-0.40=medium; > 0.5=strong)

```
z <- qnorm(0.006462)
r <- z/sqrt(93)
r
```

```
## [1] -0.2577713
```

There is a small effect between the groups.

```
ggplot(data=ENN, mapping=aes(x=Gruppe, y=ENN_22_Häusliche_Umgebung_Sicherer_vor_Erregern)) +
  stat_summary(fun.data=mean_sdl, geom="bar") +
  theme_classic()+
  labs(title="Differences in perceived safety from potential pathogens in own home environment between video consultation and real appointment groups.", x="Gruppe", y="Sicherheit")
```

```
## Warning: Removed 8 rows containing non-finite values (stat_summary).
```

Differences in perceived safety from potential pathogens in own home environment

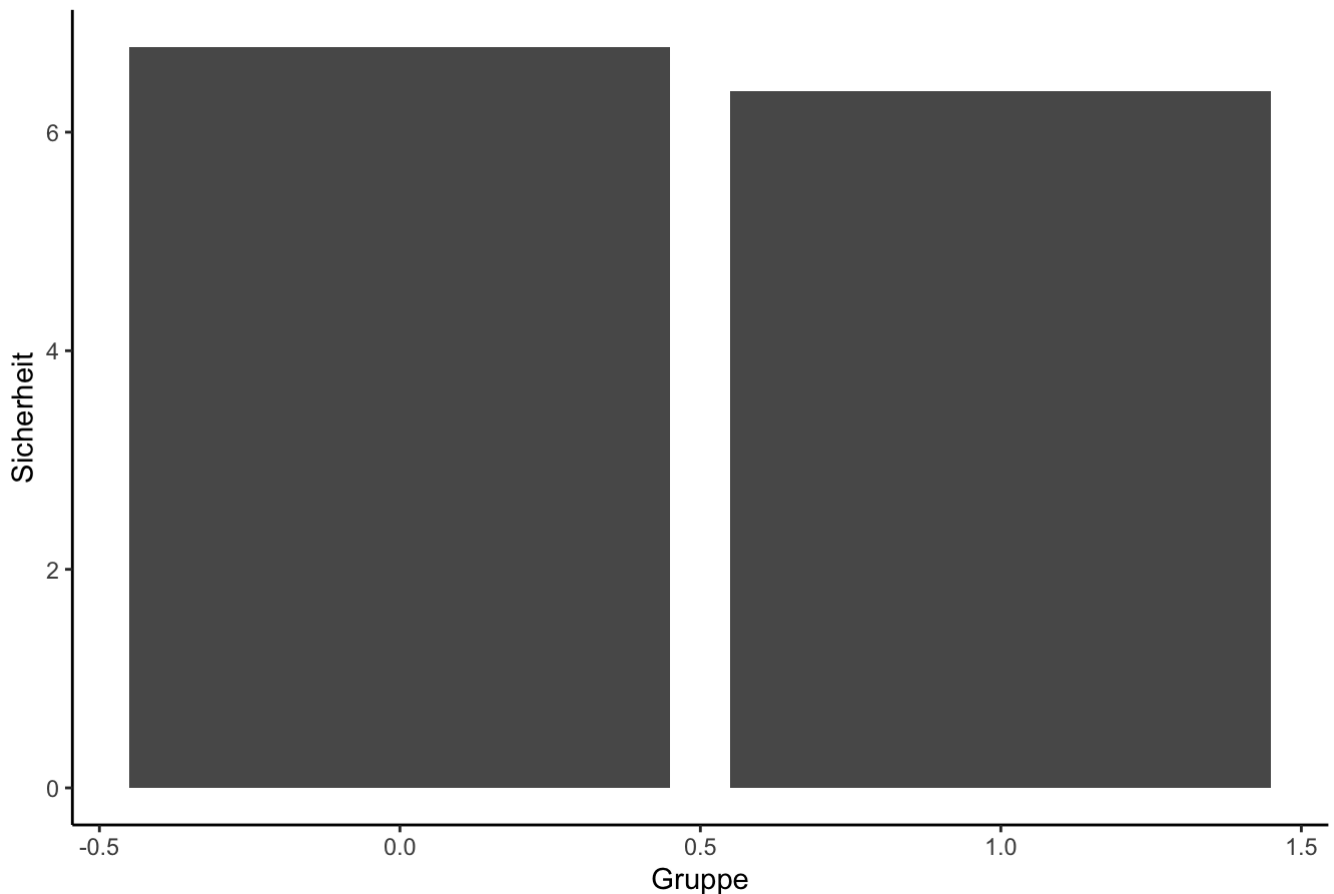

```
describeBy(ENN$ENN_23_Kontaktvermeidung_andere_Menschen, ENN$Gruppe)
boxplot(ENN_23_Kontaktvermeidung_andere_Menschen ~ Gruppe, data=ENN)
wilcox.test(ENN_23_Kontaktvermeidung_andere_Menschen ~ Gruppe, data=ENN, exact=FALSE, correct = FALSE, conf.int=TRUE)
```

### 3.5 Fourth significant difference

```
describeBy(ENN$ENN_24_Kontaktvermeidung_medizinisches_Personal, ENN$Gruppe)
```

```
##
## Descriptive statistics by group
## group: 0
##   vars  n mean   sd median trimmed  mad min max range  skew kurtosis  se
## X1    1 50 4.82 2.26     5   5.03 2.97  1  7   6 -0.62   -1.11 0.32
## -----
## group: 1
##   vars  n mean   sd median trimmed  mad min max range  skew kurtosis  se
## X1    1 35 3.89 2.25     4   3.86 2.97  1  7   6 -0.13   -1.45 0.38
```

```
boxplot(ENN_24_Kontaktvermeidung_medizinisches_Personal ~ Gruppe, data=ENN)
```

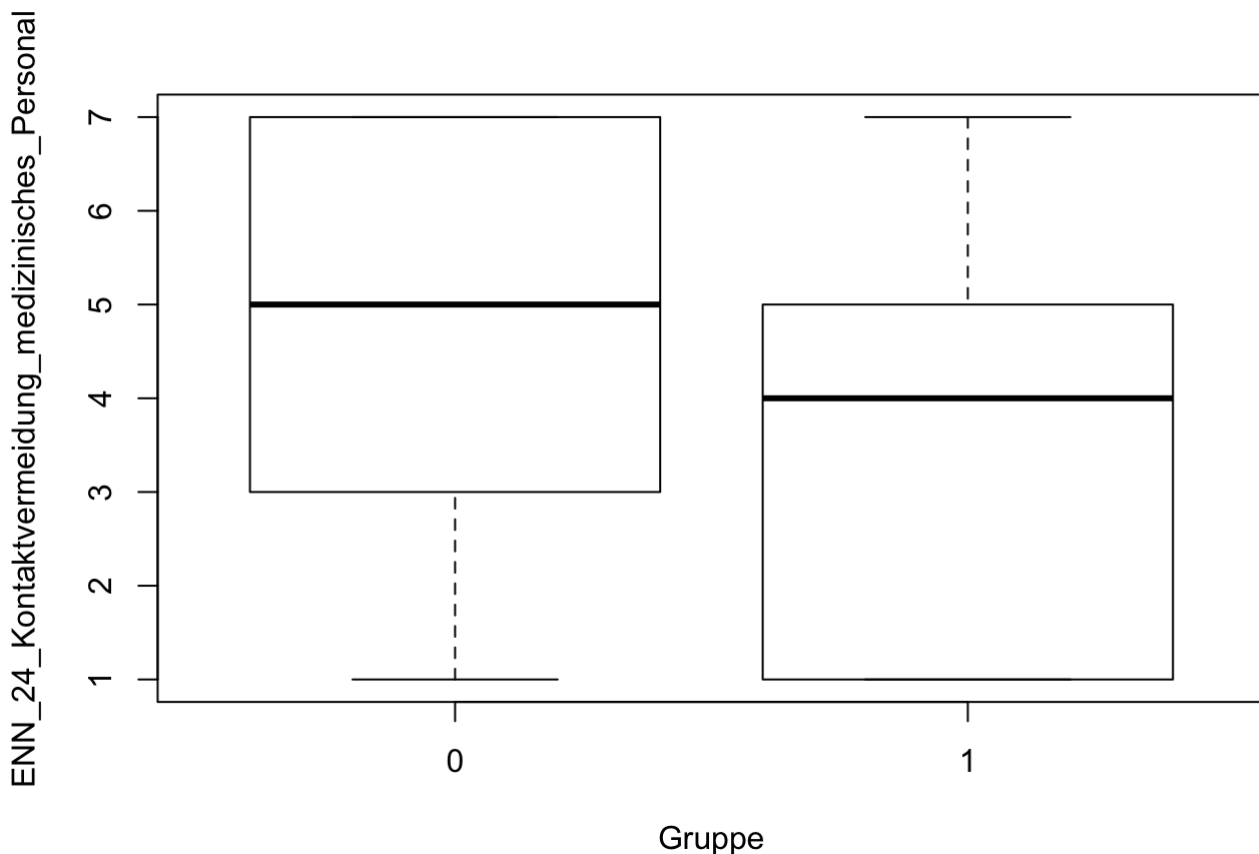

```
wilcox.test(ENN_24_Kontaktvermeidung_medizinisches_Personal ~ Gruppe, data=ENN, exact
=FALSE, correct = FALSE, conf.int=TRUE)
```

```
##
## Wilcoxon rank sum test
##
## data: ENN_24_Kontaktvermeidung_medizinisches_Personal by Gruppe
## W = 1094.5, p-value = 0.04481
## alternative hypothesis: true location shift is not equal to 0
## 95 percent confidence interval:
## 1.889837e-05 2.000006e+00
## sample estimates:
## difference in location
## 0.9999555
```



There is a significant difference between the groups.

Calculate effect size r (effect size according to Cohen: 0.1-0.29=small; 0.3-0.40=medium; > 0.5=strong)

```
z <- qnorm(0.04284)
r <- z/sqrt(93)
r
```

```
## [1] -0.1782146
```

There is a small effect between the groups

```
ggplot(data=ENN, mapping=aes(x=Gruppe, y=ENN_24_Kontaktvermeidung_medizinisches_Personal)) +
  stat_summary(fun.data=mean_sdl, geom="bar") +
  theme_classic()+
  labs(title="Differences in medical staff contact avoidance between video consultation and real appointment groups.", x="Gruppe", y="Kontaktvermeidung")
```

```
## Warning: Removed 8 rows containing non-finite values (stat_summary).
```

Differences in medical staff contact avoidance between video consultation and real

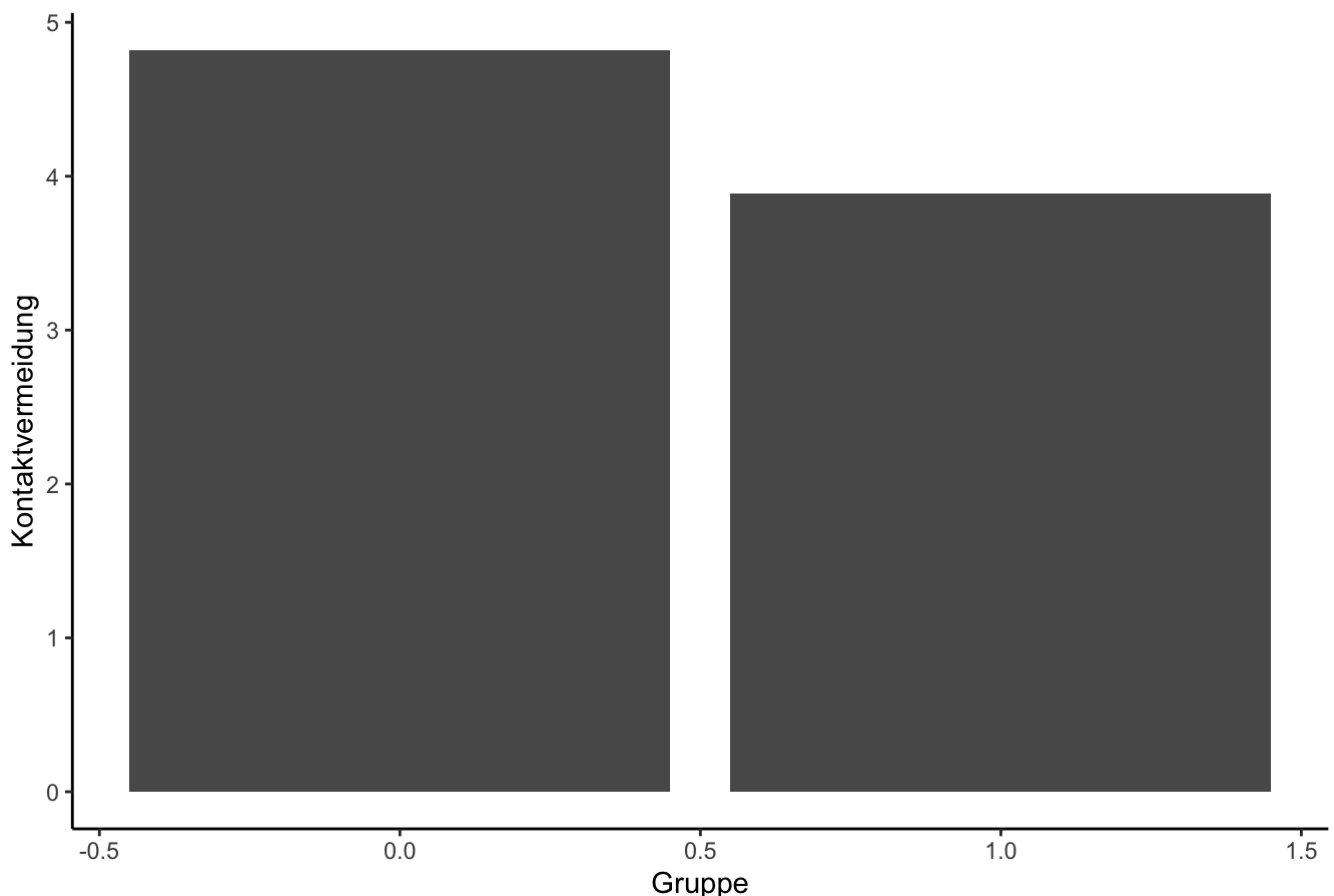

```
describeBy(ENNENN25Sorge_vor_Corona, ENNGruppe) boxplot(ENN_25_Sorge_vor_Corona ~ Gruppe,
data=ENN) wilcox.test(ENN_25_Sorge_vor_Corona ~ Gruppe, data=ENN, exact=FALSE, correct = FALSE,
conf.int=TRUE) ### There is no significant difference between the groups.
```

## 4 LOCKDOWN

## 4.1 Distribution over time of interviews conducted.

```
Lockdown <- rep(0, nrow(ENN))

Lockdown[ENN$ENN_00_Datum<=200506] <- 1
Lockdown[ENN$ENN_00_Datum>=201028 & ENN$ENN_00_Datum<=201125] <- 2
Lockdown[ENN$ENN_00_Datum>=201213 & ENN$ENN_00_Datum<= 210125] <- 3

ENN$Lockdown=Lockdown

kreuztabelle <- xtabs(~ ENN$Lockdown + ENN$Gruppe)
kreuztabelle
```

```
##           ENN$Gruppe
## ENN$Lockdown  0  1
##           0 37 26
##           1 12  6
##           2  9  0
##           3  0  3
```

```
counts <- table(ENN$Gruppe, ENN$Lockdown)
barplot(counts, main="Frequencies of interviews during the 3 lockdowns",
        xlab="Lockdown", col=c("darkblue","red"),
        legend = rownames(counts), beside=TRUE)
```

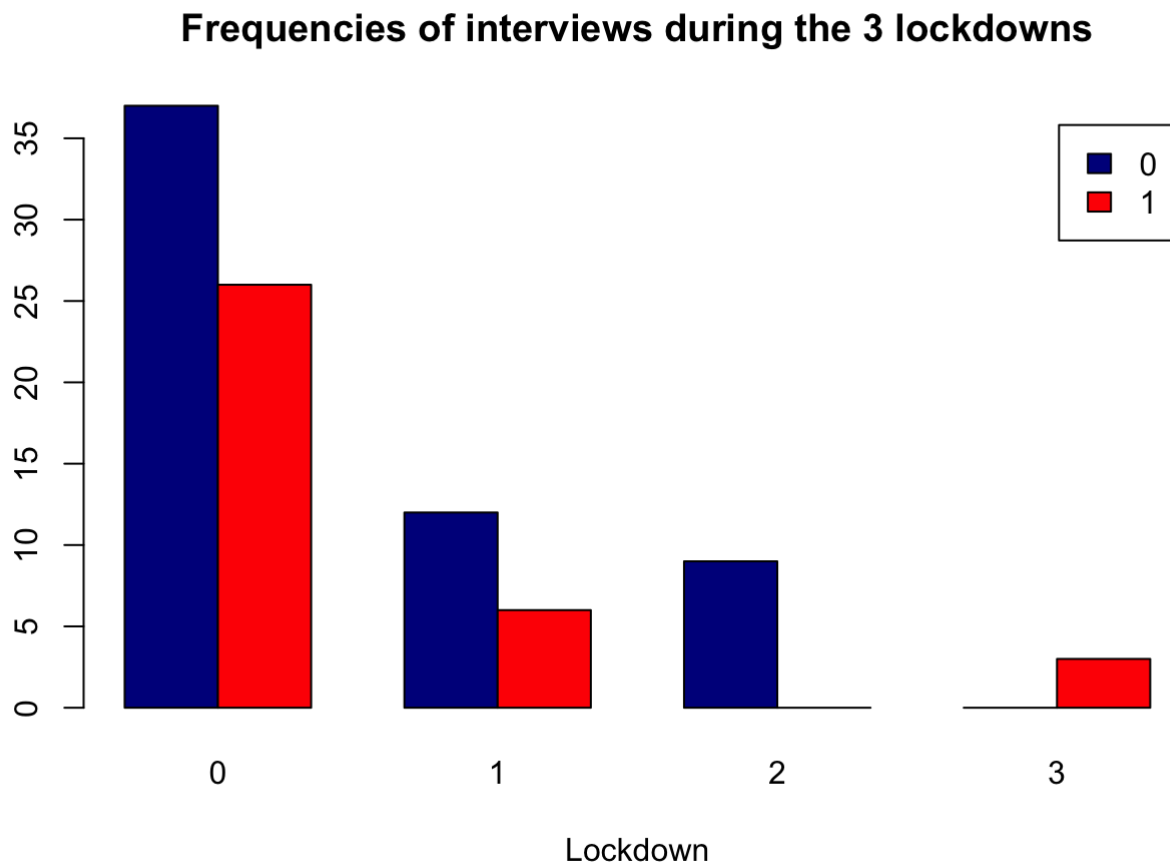

Video consultation (group=0) Real appointment (group=1)

0. interviews between the performed lockdowns
1. lockdown was everything before 06.50.2020
2. lockdown was from 10/28/2020 to 11/25/2020
3. lockdown was from 12/13/2020 to 01/25/2021

## 4.2 Calculation of the differences between the lockdowns

```
kruskal.test(ENN$Lockdown, ENN$ENN_22_Häusliche_Umgebung_Sicherer_vor_Erregern)
```

```
##  
## Kruskal-Wallis rank sum test  
##  
## data: ENN$Lockdown and ENN$ENN_22_Häusliche_Umgebung_Sicherer_vor_Erregern  
## Kruskal-Wallis chi-squared = 2.7565, df = 4, p-value = 0.5994
```

```
kruskal.test(ENN$Lockdown, ENN$ENN_23_Kontaktvermeidung_andere_Menschen)
```

```
##  
## Kruskal-Wallis rank sum test  
##  
## data: ENN$Lockdown and ENN$ENN_23_Kontaktvermeidung_andere_Menschen  
## Kruskal-Wallis chi-squared = 2.0334, df = 6, p-value = 0.9166
```

```
kruskal.test(ENN$Lockdown, ENN$ENN_24_Kontaktvermeidung_medizinisches_Personal)
```

```
##  
## Kruskal-Wallis rank sum test  
##  
## data: ENN$Lockdown and ENN$ENN_24_Kontaktvermeidung_medizinisches_Personal  
## Kruskal-Wallis chi-squared = 12.218, df = 6, p-value = 0.05727
```

```
kruskal.test(ENN$Lockdown, ENN$ENN_25_Sorge_vor_Corona)
```

```
##  
## Kruskal-Wallis rank sum test  
##  
## data: ENN$Lockdown and ENN$ENN_25_Sorge_vor_Corona  
## Kruskal-Wallis chi-squared = 7.596, df = 6, p-value = 0.2692
```

There is no significant difference between the different lockdowns in terms of safety from corona in one's home environment, avoidance of contact with other people and medical staff, as well as concern about corona for themselves and their child.

## 5 EXPLORATORY DATA ANALYSIS

## 5.1 Spearman rank correlations

```
cor.test(ENN$Lockdown, ENN$ENN_27_Zufriedenheit_Insgesamt, method="spearman")
```

```
## Warning in cor.test.default(ENN$Lockdown, ENN$ENN_27_Zufriedenheit_Insgesamt, :  
## Cannot compute exact p-value with ties
```

```
##  
## Spearman's rank correlation rho  
##  
## data: ENN$Lockdown and ENN$ENN_27_Zufriedenheit_Insgesamt  
## S = 121041, p-value = 0.5243  
## alternative hypothesis: true rho is not equal to 0  
## sample estimates:  
## rho  
## 0.06723347
```

## 6 Figure

```
## Figure 1
```

```
RHI <- read.table("figure_1.txt", header=TRUE, sep="\t")
```

```
#png("figure 1.png")#, width = 700, height = 800, res = 300)
```

```
dodge <- position_dodge(.5)
```

```
plot1 <- ggplot(data=RHI, aes(x=Item, y=M, fill=Group))+  
  geom_bar(stat="identity", width=.25, position=dodge)+  
  #scale_fill_manual(values=c("#1874CD", "#A2CD5A"))+  
  geom_errorbar(aes(ymin=M, ymax=M+SD), width=.05, position=dodge)+  
  geom_signif(  
    y_position = c(42), xmin = c(0.8), xmax = c(1.2),  
    annotation = c("*"), tip_length = 0)+  
  ylab("Age in Years")+  
  #xlab("Item")+  
  ggtitle("a")+  
  theme_minimal(base_size=10)+  
  ylim(0, 45)+  
  theme(legend.position="none")  
#guides(fill=FALSE)
```

```
#dev.off()
```

```
## figure 2
```

```
RHI <- read.table("figure_2.txt", header=TRUE, sep="\t")
```

```
#png("figure 2.png")#, width = 700, height = 800, res = 300)
```

```
dodge <- position_dodge(.5)
```

```
plot2 <- ggplot(data=RHI, aes(x=Item, y=M, fill=Group))+  
  geom_bar(stat="identity", width=.25, position=dodge)+  
  #scale_fill_manual(values=c("#1874CD", "#A2CD5A"))+  
  geom_errorbar(aes(ymin=M, ymax=M+SD), width=.05, position=dodge)+  
  geom_signif(  
    y_position = c(56), xmin = c(0.8), xmax = c(1.2),  
    annotation = c("*"), tip_length = 0)+  
  #geom_signif(comparisons=list(c("Group", "waiting time")), annotations="***", y_posi  
tion = 30, tip_length = 0, vjust=0.4)+  
  ylab("Waiting Time in Minutes")+  
  #xlab("Item")+  
  ggtitle("b")+  
  theme_minimal(base_size=10)+  
  ylim(0, 60)+  
  theme(legend.position="none")  
#guides(fill=FALSE)
```

```
#dev.off()
```

```
## figure 3
```

```
RHI <- read.table("figure_3.txt", header=TRUE, sep="\t")
```

```
#png("figure 3.png")#, width = 1600, height = 800, res = 300)
```

```
dodge <- position_dodge(.5)
```

```

plot3 <- ggplot(data=RHI, aes(x=Items, y=M, fill=Group))+
  geom_bar(stat="identity", width=.5, position=dodge)+
  #scale_fill_manual(values=c("#1874CD", "#A2CD5A"))+
  geom_errorbar(aes(ymin=M, ymax=M+SD), width=.05, position=dodge)+
  geom_signif(
    y_position = c(8, 8), xmin = c(0.8, 1.8), xmax = c(1.2, 2.2),
    annotation = c("*", "*"), tip_length = 0)+
  ylab("Level of Consent")+
  ggtitle("c")+
  #xlab("Items")+
  theme_minimal(base_size=10)+
  ylim(0, 10)+
  theme(legend.position="right")
#guides(fill=FALSE)

#dev.off()

#All plots together

#png("figure_together.png", width = 3500, height = 800, res = 300)
dodge <- position_dodge(.5)
plot1 + plot2 + plot3

```

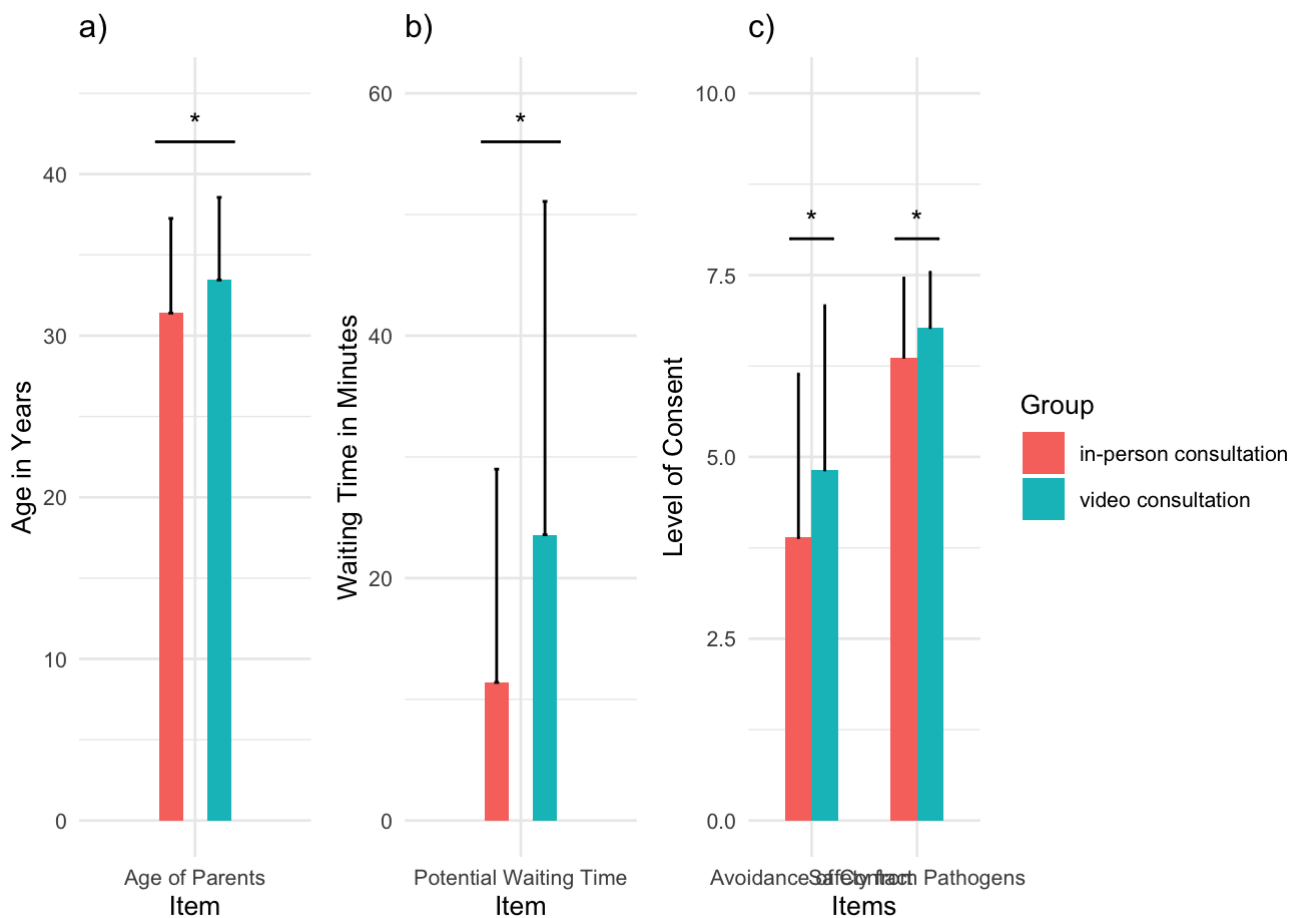

```
#dev.off()
```
